# Supplementary material for: Self-assembly processes of octahedron-shaped Pd6L12 cages
Source: Royal Society of Chemistry journal article supplement (doi:10.1039/c8dt04931a), 2019-01-01
Supplement: c8dt04931a1.pdf [file c8dt04931a1.pdf]

## Supplementary information

### *Self-assembly Processes of Octahedron-shaped Pd<sub>6</sub>L<sub>12</sub> Cages*

Shohei Komine, Tomoki Tateishi, Tatsuo Kojima, Haruna Nakagawa, Yasuhiro Hayashi, Satoshi Takahashi, and Shuichi Hiraoka\*

*Department of Basic Science, Graduate School of Arts and Sciences*

*The University of Tokyo*

*3-8-1 Komaba, Meguro-ku, Tokyo 153-8902, Japan*

*E-mail: chiraoka@mail.ecc.u-tokyo.ac.jp*

#### Contents

|                                                                                                                                                                                                                                                                                                                      |         |
|----------------------------------------------------------------------------------------------------------------------------------------------------------------------------------------------------------------------------------------------------------------------------------------------------------------------|---------|
| • General Information                                                                                                                                                                                                                                                                                                | ....S2  |
| • Materials                                                                                                                                                                                                                                                                                                          | ....S2  |
| • Quantitative analysis of self-assembly process for [Pd <sub>6</sub> L <sub>12</sub> ](BF <sub>4</sub> ) <sub>12</sub> cages                                                                                                                                                                                        | ....S2  |
| • Monitoring of the self-assembly of [Pd <sub>6</sub> L <sub>12</sub> ](BF <sub>4</sub> ) <sub>12</sub> complexes by <sup>1</sup> H NMR                                                                                                                                                                              |         |
| · Procedure for monitoring the self-assembly process of [Pd <sub>6</sub> L <sub>12</sub> ](BF <sub>4</sub> ) <sub>12</sub> complexes                                                                                                                                                                                 | ....S3  |
| · Determination of the existence ratios of each species                                                                                                                                                                                                                                                              | ....S4  |
| · <sup>1</sup> H NMR spectra for the self-assembly of [Pd <sub>6</sub> L <sub>12</sub> ](BF <sub>4</sub> ) <sub>12</sub> complexes                                                                                                                                                                                   |         |
| · [Pd <sub>6</sub> <b>1</b> <sup>S</sup> <sub>12</sub> ](BF <sub>4</sub> ) <sub>12</sub> in CD <sub>3</sub> NO <sub>2</sub> (Figure S1)                                                                                                                                                                              | ....S6  |
| · [Pd <sub>6</sub> <b>2</b> <sub>12</sub> ](BF <sub>4</sub> ) <sub>12</sub> in CD <sub>3</sub> NO <sub>2</sub> and CD <sub>2</sub> Cl <sub>2</sub> (4:1, v/v) (Figure S2)                                                                                                                                            | ....S7  |
| · [Pd <sub>6</sub> <b>3</b> <sub>12</sub> ](BF <sub>4</sub> ) <sub>12</sub> in CD <sub>3</sub> NO <sub>2</sub> and CD <sub>2</sub> Cl <sub>2</sub> (4:1, v/v) (Figure S3)                                                                                                                                            | ....S8  |
| · Time variation of L, [PdPy* <sub>4</sub> ](BF <sub>4</sub> ) <sub>2</sub> , [Pd <sub>6</sub> L <sub>12</sub> ](BF <sub>4</sub> ) <sub>12</sub> , Py*, <b>Int</b> , and the ( <i>n</i> ), ( <i>k</i> ) values for the self-assembly of [Pd <sub>6</sub> L <sub>12</sub> ](BF <sub>4</sub> ) <sub>12</sub> complexes |         |
| · [Pd <sub>6</sub> <b>1</b> <sup>S</sup> <sub>12</sub> ](BF <sub>4</sub> ) <sub>12</sub> in CD <sub>3</sub> NO <sub>2</sub> (Tables S1–S5)                                                                                                                                                                           | ....S9  |
| · [Pd <sub>6</sub> <b>2</b> <sub>12</sub> ](BF <sub>4</sub> ) <sub>12</sub> in CD <sub>3</sub> NO <sub>2</sub> and CD <sub>2</sub> Cl <sub>2</sub> (4:1, v/v) (Tables S6–S10)                                                                                                                                        | ....S14 |
| · [Pd <sub>6</sub> <b>3</b> <sub>12</sub> ](BF <sub>4</sub> ) <sub>12</sub> in CD <sub>3</sub> NO <sub>2</sub> and CD <sub>2</sub> Cl <sub>2</sub> (4:1, v/v) (Tables S11–S15)                                                                                                                                       | ....S19 |
| • Monitoring of the self-assembly of [Pd <sub>6</sub> L <sub>12</sub> ](BF <sub>4</sub> ) <sub>12</sub> complexes by ESI-TOF mass spectrometry                                                                                                                                                                       |         |
| · [Pd <sub>6</sub> <b>1</b> <sup>S</sup> <sub>12</sub> ](BF <sub>4</sub> ) <sub>12</sub> in CD <sub>3</sub> NO <sub>2</sub> (Figure S4)                                                                                                                                                                              | ....S24 |
| · [Pd <sub>6</sub> <b>2</b> <sub>12</sub> ](BF <sub>4</sub> ) <sub>12</sub> in CD <sub>3</sub> NO <sub>2</sub> and CD <sub>2</sub> Cl <sub>2</sub> (4:1, v/v) (Figure S5)                                                                                                                                            | ....S30 |
| · [Pd <sub>6</sub> <b>3</b> <sub>12</sub> ](BF <sub>4</sub> ) <sub>12</sub> in CD <sub>3</sub> NO <sub>2</sub> and CD <sub>2</sub> Cl <sub>2</sub> (4:1, v/v) (Figure S6)                                                                                                                                            | ....S32 |
| • Molecular modeling study                                                                                                                                                                                                                                                                                           |         |
| · Optimized structures of double-walled motifs <i>cis</i> -[Pd <sub>2</sub> L <sub>2</sub> Py <sub>4</sub> ] <sup>4+</sup> (Py: pyridine) for ditopic ligands <b>2</b> and <b>3</b> (Figure S7)                                                                                                                      | ....S36 |
| • References                                                                                                                                                                                                                                                                                                         | ....S36 |

## General Information

<sup>1</sup>H NMR spectra were recorded using a Bruker AV-500 (500 MHz) spectrometer. All <sup>1</sup>H NMR spectra were referenced using a residual solvent peak, CD<sub>3</sub>NO<sub>2</sub> (δ 4.33). Electrospray ionization time-of-flight (ESI-TOF) mass spectra were obtained using a Waters Xevo G2-S ToF mass spectrometer. Dynamic light scattering (DLS) measurements were performed using a Malvern Zetasizer Nano ZS instrument equipped with a He-Ne laser operating at 2 mW power and 633 nm wavelength, and a computer-controlled correlator, at 173° accumulation angle. Tapping mode AFM (Atomic Force Microscopy) experiments were executed with a NanoNavi S-image instrument (SII, Tokyo, Japan).

## Materials

Unless otherwise noted, all solvents and reagents were obtained from commercial suppliers (TCI Co., Ltd., WAKO Pure Chemical Industries Ltd., KANTO Chemical Co., Inc., and Sigma-Aldrich Co.) and were used as received. CD<sub>3</sub>NO<sub>2</sub> was purchased from Acros Organics and used after dehydration with Molecular Sieves 4Å. Ditopic ligand **1**, **2**, **3** and [PdPy\*<sub>4</sub>](BF<sub>4</sub>)<sub>2</sub><sup>4</sup> were prepared according to the literature.

## Quantitative analysis of self-assembly process for [Pd<sub>6</sub>L<sub>12</sub>](BF<sub>4</sub>)<sub>12</sub> cages

The self-assembly processes of the [Pd<sub>6</sub>L<sub>12</sub>]<sup>12+</sup> cages were investigated by QASAP (quantitative analysis of self-assembly process). In many coordination self-assemblies, the signals for most of the intermediates transiently produced during the self-assembly cannot be observed by NMR spectroscopy, which prevents us from directly obtaining the information about the intermediates. In QASAP, the average composition of all the intermediates can be obtained by the quantification of all the substrates and products. Thus, QASAP allows us to discuss the self-assembly processes from the time-development of the average composition of all the intermediates even if none of the intermediates cannot be detected. The self-assembly of [Pd<sub>6</sub>L<sub>12</sub>]<sup>12+</sup> cages from Pd(II) ions and ditopic ligands, L, is expressed by the following equation.

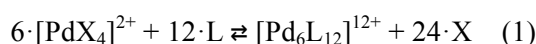

where X is a leaving ligand that originally binds to the Pd(II) ions of the metal source. 3-Chloropyridine (Py\*) was used as X in this research. All the intermediates in the self-assembly of the cages are expressed by [Pd<sub>a</sub>L<sub>b</sub>X<sub>c</sub>]<sup>2(a)+</sup> (a–c are the number of each component). What is obtained by QASAP is the average composition of all the intermediates, [Pd<sub>(a)</sub>L<sub>(b)</sub>X<sub>(c)</sub>]<sup>2(a)+</sup>. In order to investigate the self-assembly processes from the time-development of [Pd<sub>(a)</sub>L<sub>(b)</sub>X<sub>(c)</sub>]<sup>2(a)+</sup>, the following two parameters are introduced.

$$\langle n \rangle = \frac{4\langle a \rangle - \langle c \rangle}{\langle b \rangle} \quad (2)$$

$$\langle k \rangle = \frac{\langle a \rangle}{\langle b \rangle} \quad (3)$$

The  $\langle n \rangle$  value indicates the average number of Pd(II) ions that bind to a single ditopic ligand L, so the maximum of the  $\langle n \rangle$  value is 2. The  $\langle k \rangle$  value indicates the stoichiometric ratio between Pd(II) ions and the ditopic ligands L in [Pd<sub>(a)</sub>L<sub>(b)</sub>X<sub>(c)</sub>]<sup>2(a)+</sup>. The change in the ( $\langle n \rangle$ ,  $\langle k \rangle$ ) value enables us to deduce not only predominant intermediates but also reaction types (incorporation of components in

intermediates, growth of intermediates, and production of final assembly from intermediates) in the self-assembly process.

### Monitoring of the self-assembly of $[\text{Pd}_6\text{L}_{12}](\text{BF}_4)_{12}$ complexes by $^1\text{H}$ NMR

#### Procedure for monitoring the self-assembly process of $[\text{Pd}_6\text{L}_{12}](\text{BF}_4)_{12}$ complexes

A 2.4 mM solution of [2.2]paracyclophane in  $\text{CHCl}_3$  (125  $\mu\text{L}$ ), which was used as an internal standard, was added to two NMR tubes (tubes **I** and **II**) and the solvent was removed in vacuo. A solution of  $[\text{PdPy}^*_4](\text{BF}_4)_2$  (12 mM) in  $\text{CD}_3\text{NO}_2$  was prepared (solution **A**). Solution **A** (50  $\mu\text{L}$ ) and  $\text{CD}_3\text{NO}_2$  (450  $\mu\text{L}$ ) were added to tube **I**. The exact concentration of  $[\text{PdPy}^*_4](\text{BF}_4)_2$  in solution **A** was determined through the comparison of the signal intensity with [2.2]paracyclophane by  $^1\text{H}$  NMR. A solution of ditopic ligand, L (**1<sup>S</sup>**, **2**, or **3**), (12 mM) in  $\text{CHCl}_3$  (100  $\mu\text{L}$ ) was added to tube **II** and the solvent was removed in vacuo. Then  $\text{CD}_3\text{NO}_2$  (550  $\mu\text{L}$ ) for **1<sup>S</sup>** or a mixed solvent of  $\text{CD}_2\text{Cl}_2$  (120  $\mu\text{L}$ ) and  $\text{CD}_3\text{NO}_2$  (430  $\mu\text{L}$ ) for **2** and **3** was added to tube **II** and the exact amount of L in tube **II** was determined through the comparison of the signal intensity with [2.2]paracyclophane by  $^1\text{H}$  NMR. 0.50 eq. (against the amount of ligand L in tube **II**) of solution **A** (*ca.* 50  $\mu\text{L}$ ; the exact amount was determined based on the exact concentration of solution **A** and of ligand in tube **II**) were added to tube **II** at 263 K. The self-assembly of the  $[\text{Pd}_6\text{L}_{12}](\text{BF}_4)_{12}$  was monitored at 298 K by  $^1\text{H}$  NMR spectroscopy. Examples of the  $^1\text{H}$  NMR spectra are shown in Figures 2, 5, 8, S1, S2, and S3. The exact ratio of L and  $[\text{PdPy}^*_4](\text{BF}_4)_2$  was unambiguously determined by the comparison of the integral value of each  $^1\text{H}$  signal of [2.2]paracyclophane. The amounts of L,  $[\text{PdPy}^*_4](\text{BF}_4)_2$ ,  $[\text{Pd}_6\text{L}_{12}](\text{BF}_4)_{12}$ , and  $\text{Py}^*$  were quantified by the integral value of each  $^1\text{H}$  signal against the signal of the internal standard ([2.2]paracyclophane). In order to confirm the reproducibility, the same experiment was carried out three times (runs 1–3 for **1<sup>S</sup>**, 4–6 for **2**, and 7–9 for **3**) in total. These data, the average values of the existence ratios and the ( $\langle n \rangle$ ,  $\langle k \rangle$ ) values are listed in Tables S1–S5 for **1<sup>S</sup>**, S6–S10 for **2**, and S11–S15 for **3**. Standard errors shown in Figure S2, S7 and S12 were calculated based on the three runs.

Authentic samples of the final assemblies,  $\text{Pd}_6\text{L}_{12}$  (L = **1–3**), were obtained according to the original papers of the cages. Then the solvent was replaced with  $\text{CD}_3\text{NO}_2$  and  $\text{CD}_2\text{Cl}_2$  (4:1, v/v) or  $\text{CD}_3\text{NO}_2$  before the  $^1\text{H}$  NMR measurement.

### Determination of the existence ratio of each species

The relative integral value of each  $^1\text{H}$  NMR signal against the internal standard [2.2]paracyclophane is used as the integral value in this description. We define the integral values of the signal for the substrates and the products at each time  $t$  as follows:

$I_L(t)$ : 1/2 of the integral value of the  $g$  proton in free ligand **1<sup>S</sup>**

$I_M(t)$ : the integral value of the  $j$  proton of  $\text{Py}^*$  in  $[\text{PdPy}^*_4]^{2+}$

$I_{\text{cage}}(t)$ : 1/2 of the integral value of the  $g$  proton in  $[\text{Pd}_6\mathbf{1}_{12}^{\text{S}}]^{12+}$

$I_{\text{Py}^*}(t)$ : the integral value of the  $j$  proton of free  $\text{Py}^*$

(see Figures 2 and S1 to ensure the signal assignment for the self-assembly of  $[\text{Pd}_6\mathbf{1}_{12}^{\text{S}}]^{12+}$ )

$I_L(t)$ : 1/2 of the integral value of the  $q$  proton in free ligand **2**

$I_M(t)$ : the integral value of the  $j$  proton of  $\text{Py}^*$  in  $[\text{PdPy}^*_4]^{2+}$

$I_{\text{cage}}(t)$ : 1/2 of the integral value of the  $q$  proton in  $[\text{Pd}_6\mathbf{2}_{12}]^{12+}$

$I_{\text{Py}^*}(t)$ : the integral value of the  $m$  proton of free  $\text{Py}^*$

(see Figures 5 and S2 to ensure the signal assignment for the self-assembly of  $[\text{Pd}_6\mathbf{2}_{12}]^{12+}$ )

$I_L(t)$ : 1/4 of the integral value of the  $s$  proton in free ligand **3**

$I_M(t)$ : the integral value of the  $m$  proton of  $\text{Py}^*$  in  $[\text{PdPy}^*_4]^{2+}$

$I_{\text{cage}}(t)$ : 1/4 of the integral value of the  $s$  proton in  $[\text{Pd}_6\mathbf{3}_{12}]^{12+}$

$I_{\text{Py}^*}(t)$ : the integral value of the  $l$  proton of free  $\text{Py}^*$

(see Figures 8 and S3 to ensure the signal assignment for the self-assembly of  $[\text{Pd}_6\mathbf{3}_{12}]^{12+}$ )

$I_M(0)$  was determined based on the exact concentration of solution **A** determined by  $^1\text{H}$  NMR and the exact volume of solution **A** added into tube **II**.

$I_L(0)$  was determined by  $^1\text{H}$  NMR measurement before the addition of solution **A** into tube **II**.

Existence ratio of  $[\text{PdPy}^*_4]^{2+}$

As the total amount of  $[\text{PdPy}^*_4]^{2+}$  corresponds to  $I_M(0)$ , the existence ratio of  $[\text{PdPy}^*_4]^{2+}$  at  $t$  is expressed by  $I_M(t)/I_M(0)$ .

Existence ratio of L

As the total amount of free ligand L corresponds to  $I_L(0)$ , the existence ratio of L at  $t$  is expressed by  $I_L(t)/I_L(0)$ .

Existence ratio of  $\text{Py}^*$

As the total amount of  $\text{Py}^*$  corresponds to  $I_M(0)$ , the existence ratio of  $\text{Py}^*$  at  $t$  is expressed by  $I_{\text{Py}^*}(t)/I_M(0)$ .

Existence ratio of  $[\text{Pd}_6\mathbf{L}_{12}]^{12+}$

As  $[\text{Pd}_6\mathbf{L}_{12}]^{12+}$  is quantified based on L, the existence ratio of the cage at  $t$  is expressed by  $I_{\text{cage}}(t)/I_L(0)$ .

Existence ratio of the total intermediates not observed by  $^1\text{H}$  NMR (**Int**)

The existence ratio of the total intermediates not observed by  $^1\text{H}$  NMR (**Int**) is determined based on the amount of ligand L in the intermediates. Thus the existence ratio of **Int** is calculated by subtracting the other

species containing L (free L and  $[\text{Pd}_6\text{L}_{12}]^{12+}$ ) from the total amount of L ( $I_L(0)$ ). The existence ratio of **Int** at  $t$  is expressed by  $(I_L(0) - I_L(t) - I_{\text{cage}}(t))/I_L(0)$ .

$\langle a \rangle$

The total amount of Pd(II) ions corresponds to  $I_M(0)/4$ . The amount of Pd(II) ions in  $[\text{PdPy}^*_4]^{2+}$  at  $t$  corresponds to  $I_M(t)/4$ . The amount of Pd(II) ions in  $[\text{Pd}_6\text{L}_{12}]^{12+}$  at  $t$  corresponds to  $I_{\text{cage}}(t)/2$ , respectively. The amount of Pd(II) ions in **Int** at  $t$  is thus expressed by  $I_M(0)/4 - I_M(t)/4 - I_{\text{cage}}(t)/2$ .

$\langle b \rangle$

The total amount of ligand L corresponds to  $I_L(0)$ . The amount of free ligand L at  $t$  corresponds to  $I_L(t)$ . The amounts of ligand L in  $[\text{Pd}_6\text{L}_{12}]^{12+}$  at  $t$  corresponds to  $I_{\text{cage}}(t)$ , respectively. The amount of ligand L in **Int** at  $t$  is thus expressed by  $I_L(0) - I_L(t) - I_{\text{cage}}(t)$ .

$\langle c \rangle$

The total amount of Py\* corresponds to  $I_M(0)$ . The amount of free Py\* at  $t$  corresponds to  $I_{\text{Py}^*}(t)$ . The amount of Py\* in  $[\text{PdPy}^*_4]^{2+}$  at  $t$  corresponds to  $I_M(t)$ . The amount of Py\* in **Int** at  $t$  is thus expressed by  $I_M(0) - I_{\text{Py}^*}(t) - I_M(t)$ .

The  $\langle n \rangle$  and  $\langle k \rangle$  values are determined with these  $\langle a \rangle$ ,  $\langle b \rangle$ , and  $\langle c \rangle$  values by eqs. (S1) and (S2).

$$\langle n \rangle = \frac{4 \langle a \rangle - \langle c \rangle}{\langle b \rangle} \quad (\text{S1})$$

$$\langle k \rangle = \frac{\langle a \rangle}{\langle b \rangle} \quad (\text{S2})$$

# <sup>1</sup>H NMR spectra for the self-assembly of [Pd<sub>6</sub>L<sub>12</sub>](BF<sub>4</sub>)<sub>12</sub> complexes

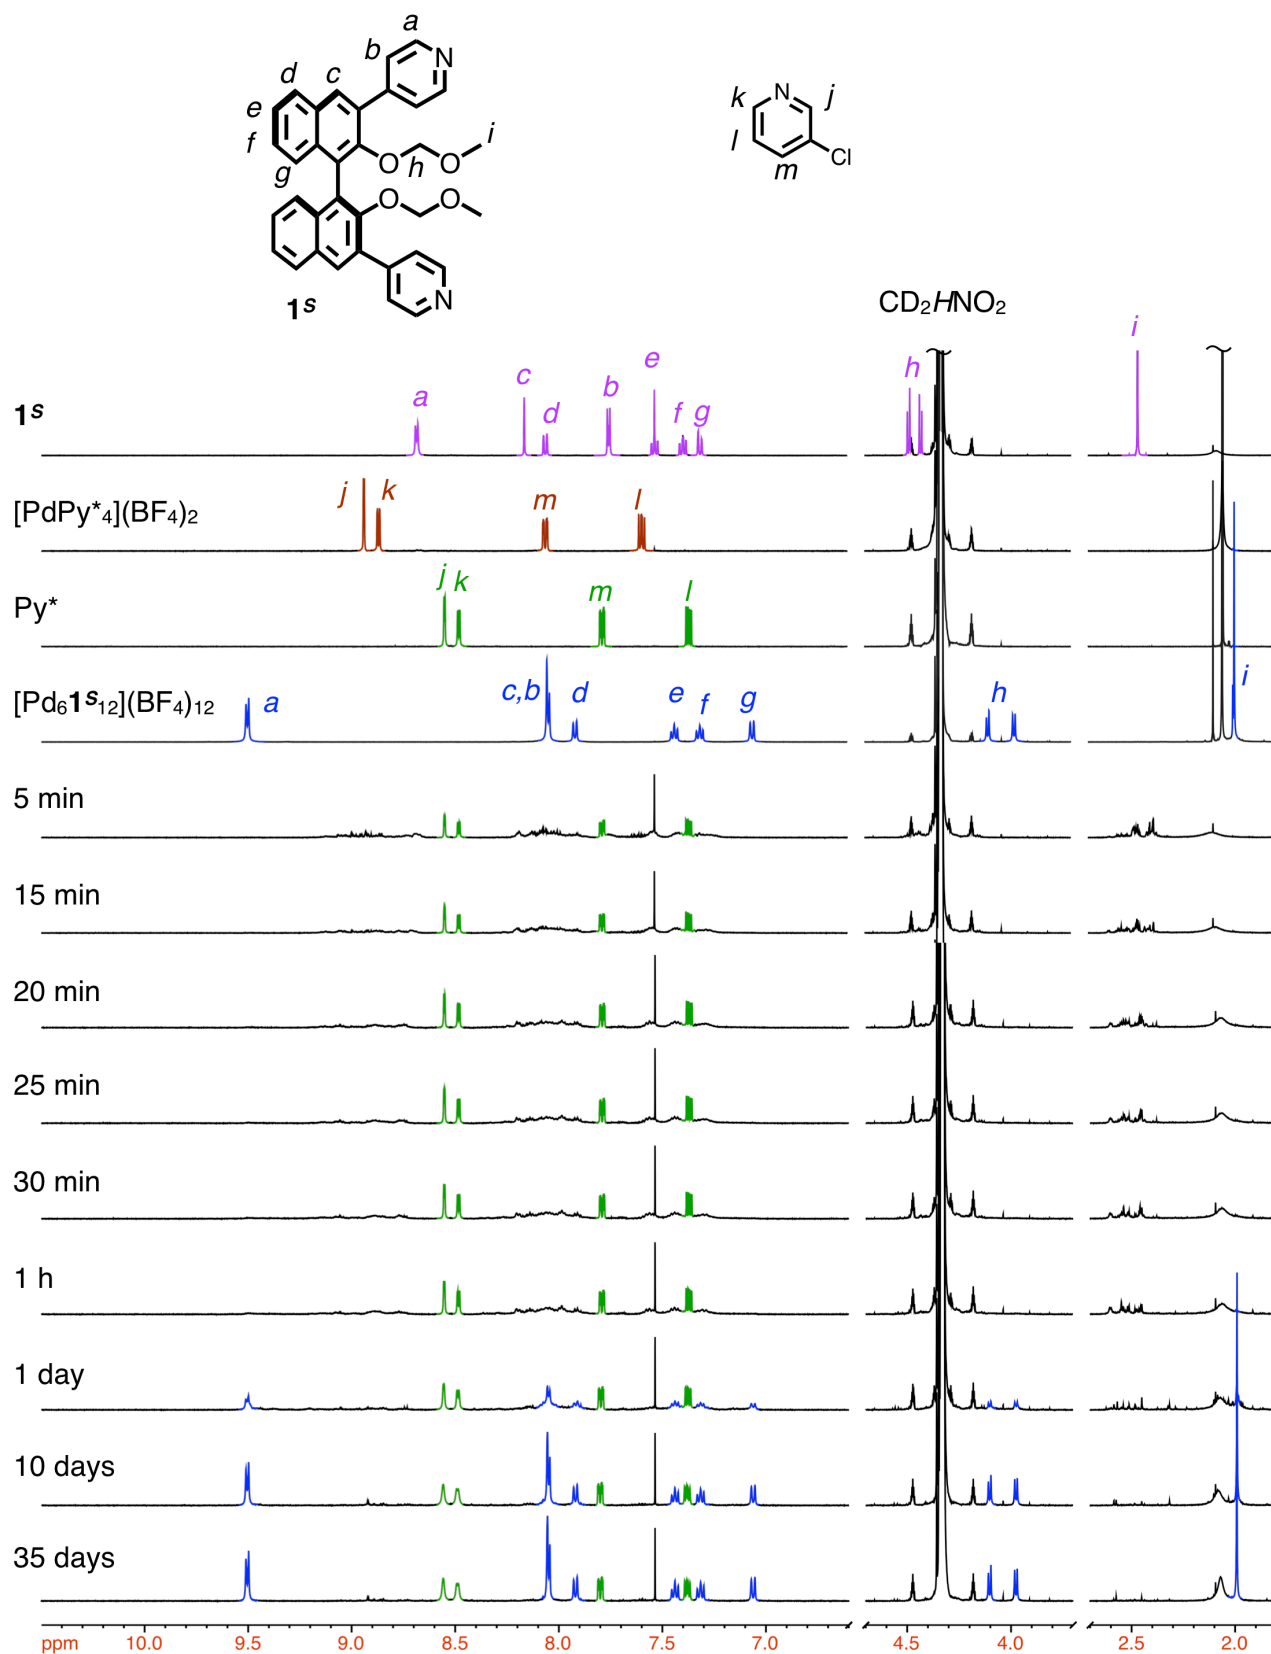

**Figure S1.** <sup>1</sup>H NMR spectra (500 MHz, CD<sub>3</sub>NO<sub>2</sub>, 298 K) of the reaction mixture for the self-assembly of [Pd<sub>6</sub>1<sup>S</sup><sub>12</sub>](BF<sub>4</sub>)<sub>12</sub> from 1<sup>S</sup> and [PdPy\*<sub>4</sub>](BF<sub>4</sub>)<sub>2</sub> at 298 K ([Pd]<sub>0</sub> = 0.95 mM and [1<sup>S</sup>]<sub>0</sub> = 1.9 mM). The signals colored in purple, brown, blue, and green indicate free 1<sup>S</sup>, [PdPy\*<sub>4</sub>](BF<sub>4</sub>)<sub>2</sub>, [Pd<sub>6</sub>1<sup>S</sup><sub>12</sub>](BF<sub>4</sub>)<sub>12</sub>, and Py\*, respectively.

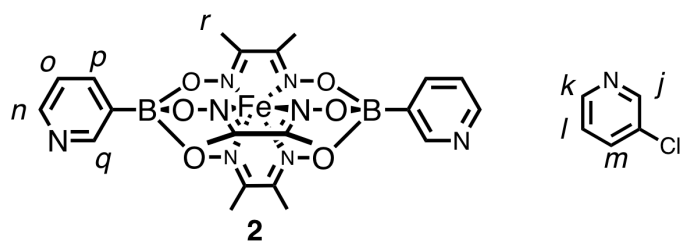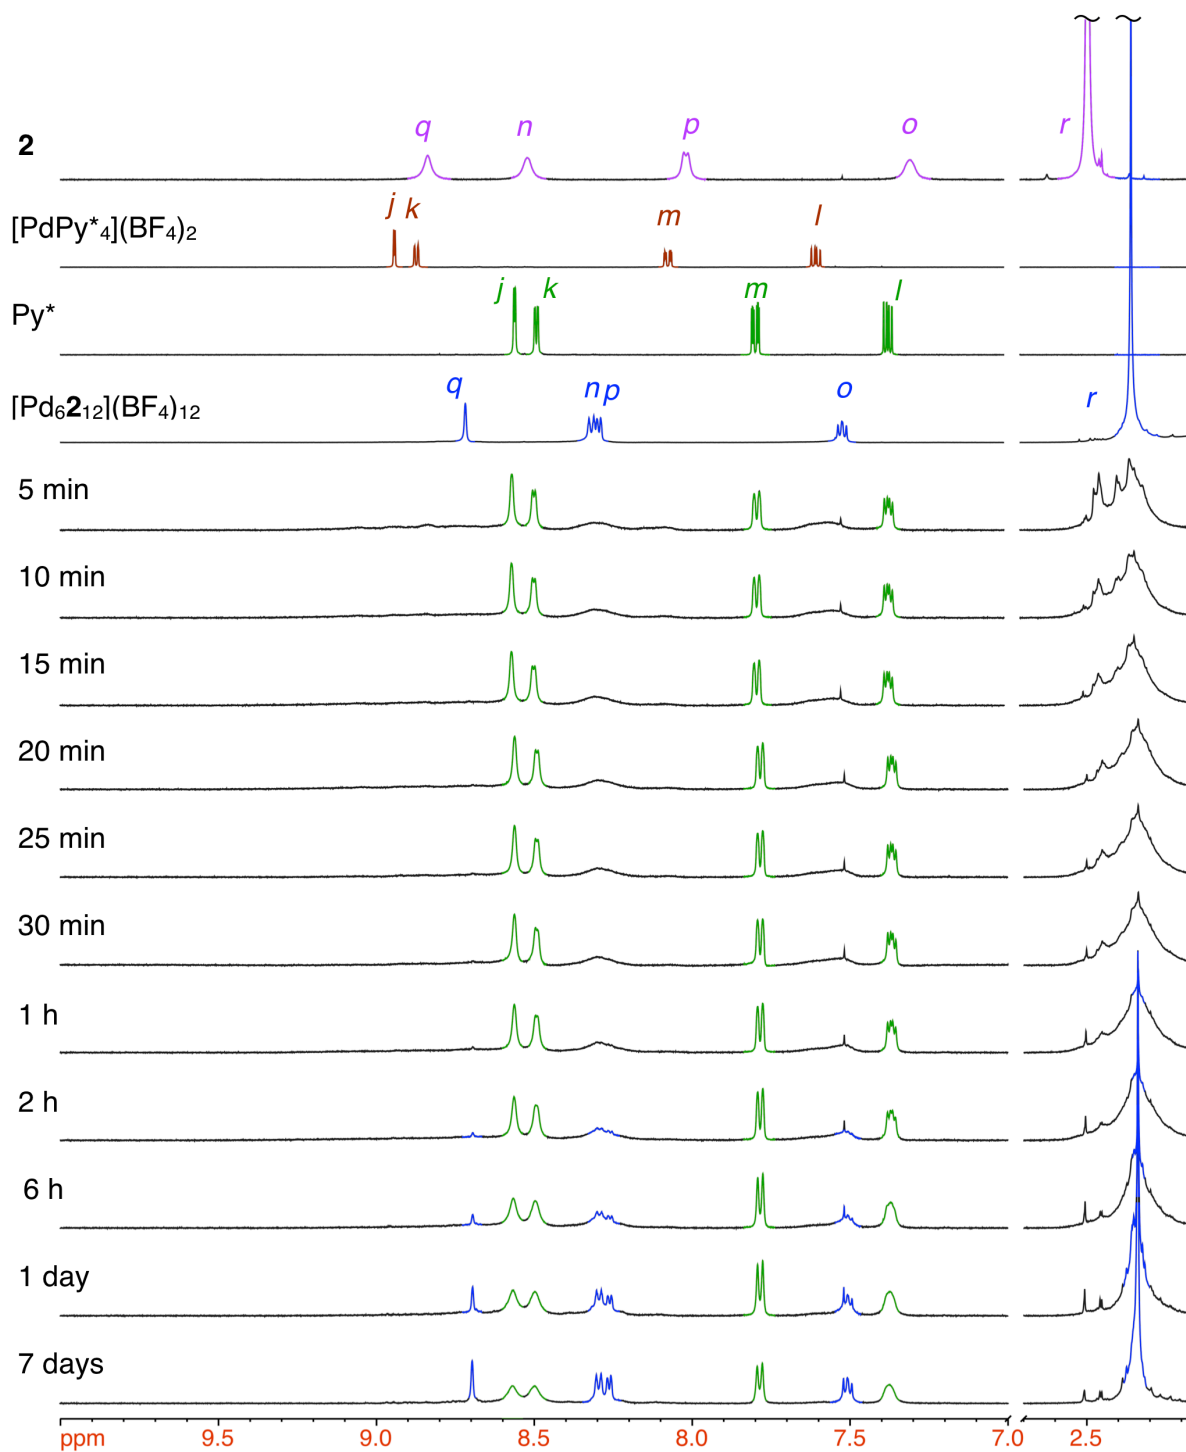

**Figure S2.** <sup>1</sup>H NMR spectra (500 MHz, CD<sub>3</sub>NO<sub>2</sub> and CD<sub>2</sub>Cl<sub>2</sub> (4:1, v/v), 298 K) of the reaction mixture for the self-assembly of [Pd<sub>6</sub>**2**]<sub>12</sub>(BF<sub>4</sub>)<sub>12</sub> from **2** and [PdPy\*<sub>4</sub>](BF<sub>4</sub>)<sub>2</sub> at 298 K ([Pd]<sub>0</sub> = 1.1 mM and [**2**]<sub>0</sub> = 2.1 mM). The signals colored in purple, brown, blue, and green indicate free **2**, [PdPy\*<sub>4</sub>](BF<sub>4</sub>)<sub>2</sub>, [Pd<sub>6</sub>**2**]<sub>12</sub>(BF<sub>4</sub>)<sub>12</sub>, and Py\*, respectively.

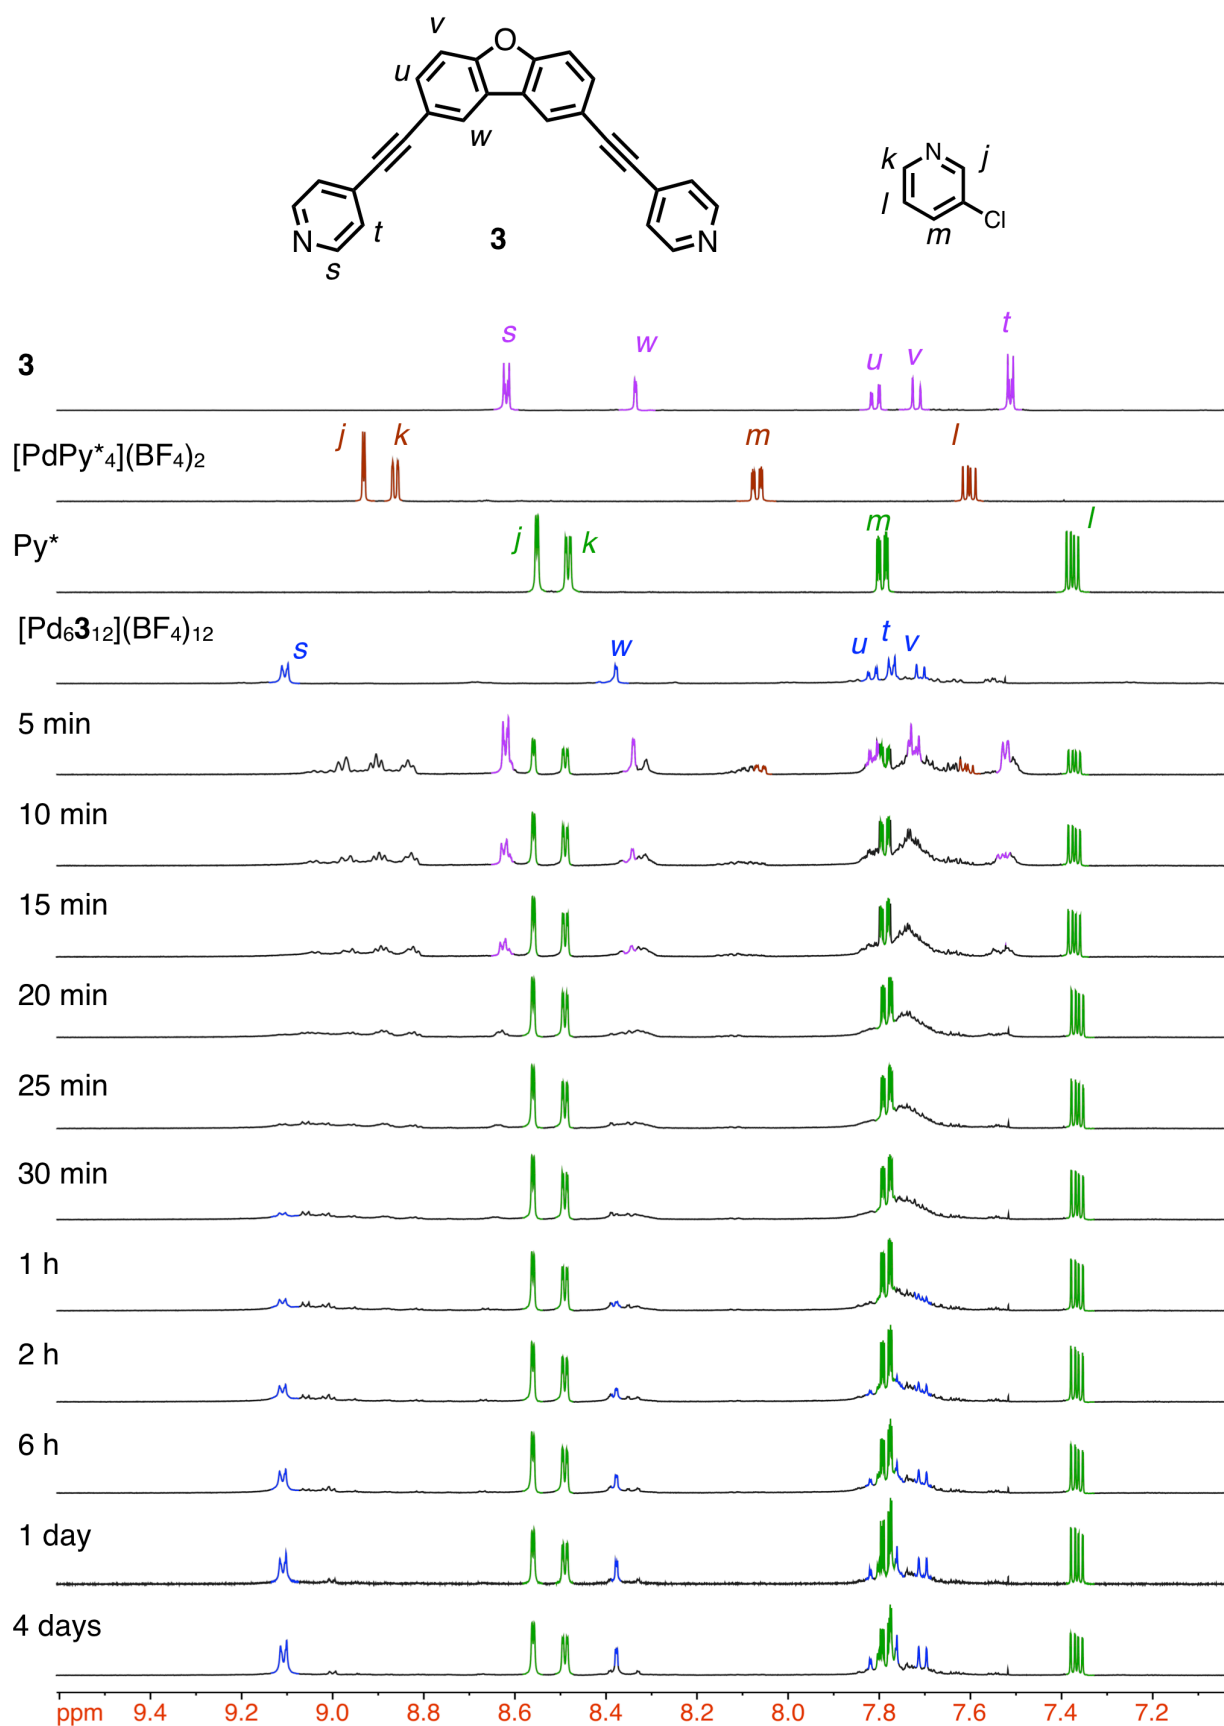

**Figure S3.**  $^1\text{H}$  NMR spectra (500 MHz,  $\text{CD}_3\text{NO}_2$  and  $\text{CD}_2\text{Cl}_2$  (4:1, v/v), 298 K, aromatic region) of the reaction mixture for the self-assembly of  $[\text{Pd}_6\mathbf{3}_{12}](\text{BF}_4)_{12}$  from **3** and  $[\text{PdPy}^*_4](\text{BF}_4)_2$  at 298 K ( $[\text{Pd}]_0 = 1.1$  mM and  $[\mathbf{3}]_0 = 2.2$  mM). The signals colored in purple, brown, blue, and green indicate free **3**,  $[\text{PdPy}^*_4](\text{BF}_4)_2$ ,  $[\text{Pd}_6\mathbf{3}_{12}](\text{BF}_4)_{12}$ , and Py\*, respectively.



**Time variation of L, [PdPy\*<sub>4</sub>](BF<sub>4</sub>)<sub>2</sub>, [Pd<sub>6</sub>L<sub>12</sub>](BF<sub>4</sub>)<sub>12</sub>, Py\*, Int, and the ⟨n⟩, ⟨k⟩ values for the self-assembly of [Pd<sub>6</sub>L<sub>12</sub>](BF<sub>4</sub>)<sub>12</sub> complexes**

**Table S1.** Average time variation of **1<sup>S</sup>**, [PdPy\*<sub>4</sub>](BF<sub>4</sub>)<sub>2</sub>, [Pd<sub>6</sub>1<sup>S</sup><sub>12</sub>](BF<sub>4</sub>)<sub>12</sub>, Py\*, and **Int**; ⟨a⟩–⟨c⟩ values of the average composition of the intermediates ([Pd<sub>(a)</sub>1<sup>S</sup><sub>(b)</sub>Py\*<sub>(c)</sub>]<sup>2(a)+</sup>); ⟨n⟩, ⟨k⟩ values for the self-assembly of [Pd<sub>6</sub>1<sup>S</sup><sub>12</sub>] from **1<sup>S</sup>** and [PdPy\*<sub>4</sub>](BF<sub>4</sub>)<sub>2</sub> in CD<sub>3</sub>NO<sub>2</sub> at 298 K ([1<sup>S</sup>]<sub>0</sub> = ca. 1.9 mM).

| Time<br>/ min | <b>1<sup>S</sup></b><br>/ % | [PdPy* <sub>4</sub> ] <sup>2+</sup><br>/ % | [Pd <sub>6</sub> 1 <sup>S</sup> <sub>12</sub> ] <sup>12+</sup><br>/ % | Py*<br>/ % | <b>Int</b><br>/ % | ⟨a⟩   | ⟨b⟩   | ⟨c⟩   | ⟨n⟩   | ⟨k⟩   |
|---------------|-----------------------------|--------------------------------------------|-----------------------------------------------------------------------|------------|-------------------|-------|-------|-------|-------|-------|
| 0             | 100.0                       | 100.0                                      | 0.0                                                                   | 0.0        | 0.0               | —     | —     | —     | —     | —     |
| 5             | 0.0                         | 0.0                                        | 0.0                                                                   | 67.5       | 100.0             | 0.240 | 0.481 | 0.313 | 1.349 | 0.500 |
| 10            | 0.0                         | 0.0                                        | 0.0                                                                   | 80.3       | 100.0             | 0.240 | 0.481 | 0.190 | 1.606 | 0.500 |
| 15            | 0.0                         | 0.0                                        | 0.0                                                                   | 85.6       | 100.0             | 0.240 | 0.481 | 0.138 | 1.712 | 0.500 |
| 20            | 0.0                         | 0.0                                        | 0.0                                                                   | 89.1       | 100.0             | 0.240 | 0.481 | 0.105 | 1.782 | 0.500 |
| 25            | 0.0                         | 0.0                                        | 0.0                                                                   | 92.7       | 100.0             | 0.240 | 0.481 | 0.071 | 1.854 | 0.500 |
| 30            | 0.0                         | 0.0                                        | 0.0                                                                   | 94.9       | 100.0             | 0.240 | 0.481 | 0.049 | 1.899 | 0.500 |
| 35            | 0.0                         | 0.0                                        | 0.0                                                                   | 94.1       | 100.0             | 0.240 | 0.481 | 0.057 | 1.882 | 0.500 |
| 40            | 0.0                         | 0.0                                        | 0.0                                                                   | 96.2       | 100.0             | 0.240 | 0.481 | 0.037 | 1.923 | 0.500 |
| 45            | 0.0                         | 0.0                                        | 0.0                                                                   | 95.6       | 100.0             | 0.240 | 0.481 | 0.042 | 1.911 | 0.500 |
| 50            | 0.0                         | 0.0                                        | 0.0                                                                   | 96.1       | 100.0             | 0.240 | 0.481 | 0.037 | 1.923 | 0.500 |
| 55            | 0.0                         | 0.0                                        | 0.0                                                                   | 96.3       | 100.0             | 0.240 | 0.481 | 0.035 | 1.927 | 0.500 |
| 60            | 0.0                         | 0.0                                        | 6.3                                                                   | 97.2       | 93.7              | 0.225 | 0.450 | 0.027 | 1.941 | 0.500 |
| 120           | 0.0                         | 0.0                                        | 8.7                                                                   | 96.2       | 91.3              | 0.219 | 0.439 | 0.036 | 1.918 | 0.500 |
| 180           | 0.0                         | 0.0                                        | 13.7                                                                  | 95.6       | 86.3              | 0.207 | 0.415 | 0.042 | 1.899 | 0.500 |
| 240           | 0.0                         | 0.0                                        | 15.5                                                                  | 97.1       | 84.5              | 0.203 | 0.406 | 0.027 | 1.932 | 0.500 |
| 300           | 0.0                         | 0.0                                        | 17.5                                                                  | 97.3       | 82.5              | 0.198 | 0.397 | 0.026 | 1.935 | 0.500 |
| 360           | 0.0                         | 0.0                                        | 20.5                                                                  | 97.6       | 79.5              | 0.191 | 0.382 | 0.023 | 1.939 | 0.500 |
| 420           | 0.0                         | 0.0                                        | 20.6                                                                  | 97.4       | 79.4              | 0.191 | 0.382 | 0.025 | 1.935 | 0.500 |
| 480           | 0.0                         | 0.0                                        | 22.5                                                                  | 98.5       | 77.5              | 0.186 | 0.373 | 0.014 | 1.960 | 0.500 |
| 540           | 0.0                         | 0.0                                        | 23.4                                                                  | 96.7       | 76.6              | 0.184 | 0.368 | 0.031 | 1.914 | 0.500 |
| 720           | 0.0                         | 0.0                                        | 28.9                                                                  | 96.6       | 71.1              | 0.171 | 0.342 | 0.033 | 1.903 | 0.500 |
| 1440          | 0.0                         | 0.0                                        | 43.4                                                                  | 97.9       | 56.6              | 0.136 | 0.272 | 0.019 | 1.925 | 0.500 |
| 2160          | 0.0                         | 0.0                                        | 51.2                                                                  | 98.0       | 48.8              | 0.117 | 0.235 | 0.019 | 1.916 | 0.500 |
| 2880          | 0.0                         | 0.0                                        | 58.3                                                                  | 98.5       | 41.7              | 0.100 | 0.201 | 0.015 | 1.923 | 0.500 |
| 3600          | 0.0                         | 0.0                                        | 63.2                                                                  | 99.0       | 36.8              | 0.089 | 0.177 | 0.010 | 1.948 | 0.500 |
| 4320          | 0.0                         | 0.0                                        | 66.1                                                                  | 98.8       | 33.9              | 0.082 | 0.164 | 0.011 | 1.930 | 0.500 |
| 5040          | 0.0                         | 0.0                                        | 68.3                                                                  | 98.7       | 31.7              | 0.076 | 0.153 | 0.012 | 1.913 | 0.500 |
| 5760          | 0.0                         | 0.0                                        | 70.9                                                                  | 99.4       | 29.1              | 0.070 | 0.140 | 0.006 | 1.956 | 0.500 |
| 6480          | 0.0                         | 0.0                                        | 73.6                                                                  | 99.3       | 26.4              | 0.064 | 0.127 | 0.007 | 1.942 | 0.500 |
| 14400         | 0.0                         | 0.0                                        | 83.5                                                                  | 98.7       | 16.5              | 0.040 | 0.080 | 0.012 | 1.837 | 0.500 |
| 20160         | 0.0                         | 0.0                                        | 85.8                                                                  | 99.4       | 14.2              | 0.034 | 0.069 | 0.006 | 1.892 | 0.500 |
| 30240         | 0.0                         | 0.0                                        | 87.4                                                                  | 99.3       | 12.6              | 0.030 | 0.061 | 0.007 | 1.845 | 0.500 |
| 40320         | 0.0                         | 0.0                                        | 88.6                                                                  | 99.1       | 11.4              | 0.028 | 0.055 | 0.009 | 1.801 | 0.500 |
| 50400         | 0.0                         | 0.0                                        | 90.4                                                                  | 99.1       | 9.6               | 0.023 | 0.046 | 0.009 | 1.776 | 0.500 |

**Table S2.** Standard errors for each time point of  $\mathbf{1}^S$ ,  $[\text{PdPy}^*_4](\text{BF}_4)_2$ ,  $[\text{Pd}_6\mathbf{1}^S_{12}](\text{BF}_4)_{12}$ ,  $\text{Py}^*$ , and **Int**;  $\langle a \rangle$ – $\langle c \rangle$  values of the average composition of the intermediates ( $[\text{Pd}_{\langle a \rangle}\mathbf{1}^S_{\langle b \rangle}\text{Py}^*_{\langle c \rangle}]^{2\langle a \rangle+}$ ); ( $\langle n \rangle$ ,  $\langle k \rangle$ ) values for the self-assembly of  $[\text{Pd}_6\mathbf{1}^S_{12}](\text{BF}_4)_{12}$  from  $\mathbf{1}^S$  and  $[\text{PdPy}^*_4](\text{BF}_4)_2$  in  $\text{CD}_3\text{NO}_2$  at 298 K ( $[\mathbf{1}^S]_0 = ca. 1.9 \text{ mM}$ ).

| Time<br>/ min | $\mathbf{1}^S$<br>/ % | $[\text{PdPy}^*_4]^{2+}$<br>/ % | $[\text{Pd}_6\mathbf{1}^S_{12}]^{12+}$<br>/ % | $\text{Py}^*$<br>/ % | <b>Int</b><br>/ % | $\langle a \rangle$ | $\langle b \rangle$ | $\langle c \rangle$ | $\langle n \rangle$ | $\langle k \rangle$ |
|---------------|-----------------------|---------------------------------|-----------------------------------------------|----------------------|-------------------|---------------------|---------------------|---------------------|---------------------|---------------------|
| 0             | 0                     | 0                               | 0.00                                          | 0.00                 | 0.00              | —                   | —                   | —                   | —                   | —                   |
| 5             | 0                     | 0                               | 0.00                                          | 0.72                 | 0.00              | 0.005               | 0.010               | 0.012               | 0.014               | 0.000               |
| 10            | 0                     | 0                               | 0.00                                          | 1.09                 | 0.00              | 0.005               | 0.010               | 0.014               | 0.022               | 0.000               |
| 15            | 0                     | 0                               | 0.00                                          | 0.51                 | 0.00              | 0.005               | 0.010               | 0.004               | 0.010               | 0.000               |
| 20            | 0                     | 0                               | 0.00                                          | 1.12                 | 0.00              | 0.005               | 0.010               | 0.012               | 0.022               | 0.000               |
| 25            | 0                     | 0                               | 0.00                                          | 1.40                 | 0.00              | 0.005               | 0.010               | 0.015               | 0.028               | 0.000               |
| 30            | 0                     | 0                               | 0.00                                          | 1.20                 | 0.00              | 0.005               | 0.010               | 0.012               | 0.024               | 0.000               |
| 35            | 0                     | 0                               | 0.00                                          | 1.62                 | 0.00              | 0.005               | 0.010               | 0.016               | 0.032               | 0.000               |
| 40            | 0                     | 0                               | 0.00                                          | 0.96                 | 0.00              | 0.005               | 0.010               | 0.009               | 0.019               | 0.000               |
| 45            | 0                     | 0                               | 0.00                                          | 0.75                 | 0.00              | 0.005               | 0.010               | 0.006               | 0.015               | 0.000               |
| 50            | 0                     | 0                               | 0.00                                          | 1.13                 | 0.00              | 0.005               | 0.010               | 0.011               | 0.023               | 0.000               |
| 55            | 0                     | 0                               | 0.00                                          | 1.03                 | 0.00              | 0.005               | 0.010               | 0.009               | 0.021               | 0.000               |
| 60            | 0                     | 0                               | 0.96                                          | 0.76                 | 0.96              | 0.004               | 0.008               | 0.007               | 0.016               | 0.000               |
| 120           | 0                     | 0                               | 1.20                                          | 2.08                 | 1.20              | 0.002               | 0.003               | 0.019               | 0.044               | 0.000               |
| 180           | 0                     | 0                               | 0.32                                          | 0.89                 | 0.32              | 0.004               | 0.009               | 0.008               | 0.020               | 0.000               |
| 240           | 0                     | 0                               | 0.21                                          | 0.65                 | 0.21              | 0.005               | 0.009               | 0.006               | 0.016               | 0.000               |
| 300           | 0                     | 0                               | 1.20                                          | 0.84                 | 1.20              | 0.007               | 0.014               | 0.008               | 0.020               | 0.000               |
| 360           | 0                     | 0                               | 0.28                                          | 1.33                 | 0.28              | 0.004               | 0.008               | 0.013               | 0.033               | 0.000               |
| 420           | 0                     | 0                               | 0.76                                          | 0.71                 | 0.76              | 0.005               | 0.011               | 0.007               | 0.018               | 0.000               |
| 480           | 0                     | 0                               | 1.05                                          | 0.80                 | 1.05              | 0.006               | 0.013               | 0.008               | 0.021               | 0.000               |
| 540           | 0                     | 0                               | 0.71                                          | 1.01                 | 0.71              | 0.005               | 0.010               | 0.010               | 0.026               | 0.000               |
| 720           | 0                     | 0                               | 0.66                                          | 0.83                 | 0.66              | 0.005               | 0.010               | 0.007               | 0.024               | 0.000               |
| 1440          | 0                     | 0                               | 1.24                                          | 1.35                 | 1.24              | 0.006               | 0.011               | 0.012               | 0.050               | 0.000               |
| 2160          | 0                     | 0                               | 1.67                                          | 0.78                 | 1.67              | 0.006               | 0.012               | 0.007               | 0.036               | 0.000               |
| 2880          | 0                     | 0                               | 2.53                                          | 0.43                 | 2.53              | 0.008               | 0.016               | 0.004               | 0.027               | 0.000               |
| 3600          | 0                     | 0                               | 3.19                                          | 0.46                 | 3.19              | 0.009               | 0.018               | 0.004               | 0.022               | 0.000               |
| 4320          | 0                     | 0                               | 3.08                                          | 0.27                 | 3.08              | 0.009               | 0.018               | 0.003               | 0.016               | 0.000               |
| 5040          | 0                     | 0                               | 3.09                                          | 0.28                 | 3.09              | 0.009               | 0.018               | 0.003               | 0.028               | 0.000               |
| 5760          | 0                     | 0                               | 2.14                                          | 0.40                 | 2.14              | 0.007               | 0.013               | 0.004               | 0.031               | 0.000               |
| 6480          | 0                     | 0                               | 2.47                                          | 0.29                 | 2.47              | 0.007               | 0.014               | 0.003               | 0.028               | 0.000               |
| 14400         | 0                     | 0                               | 2.93                                          | 0.39                 | 2.93              | 0.007               | 0.015               | 0.004               | 0.058               | 0.000               |
| 20160         | 0                     | 0                               | 2.57                                          | 0.23                 | 2.57              | 0.006               | 0.013               | 0.002               | 0.057               | 0.000               |
| 30240         | 0                     | 0                               | 2.94                                          | 0.27                 | 2.94              | 0.007               | 0.015               | 0.002               | 0.092               | 0.000               |
| 40320         | 0                     | 0                               | 2.89                                          | 0.06                 | 2.89              | 0.007               | 0.014               | 0.001               | 0.068               | 0.000               |
| 50400         | 0                     | 0                               | 2.20                                          | 0.06                 | 2.20              | 0.005               | 0.011               | 0.001               | 0.060               | 0.000               |

**Table S3.** Time variation of  $\mathbf{1}^S$ ,  $[\text{PdPy}^*_4](\text{BF}_4)_2$ ,  $[\text{Pd}_6\mathbf{1}^S_{12}](\text{BF}_4)_{12}$ ,  $\text{Py}^*$ , and **Int**;  $\langle a \rangle$ – $\langle c \rangle$  values of the average composition of the intermediates ( $[\text{Pd}_{\langle a \rangle}\mathbf{1}^S_{\langle b \rangle}\text{Py}^*_{\langle c \rangle}]^{2\langle a \rangle+}$ ); ( $\langle n \rangle$ ,  $\langle k \rangle$ ) values for the self-assembly of  $[\text{Pd}_6\mathbf{1}^S_{12}](\text{BF}_4)_{12}$  from  $\mathbf{1}^S$  and  $[\text{PdPy}^*_4](\text{BF}_4)_2$  in  $\text{CD}_3\text{NO}_2$  at 298 K ( $[\mathbf{1}^S]_0 = 1.9 \text{ mM}$ ). (run 1)

| Time<br>/ min | $\mathbf{1}^S$<br>/ % | $[\text{PdPy}^*_4]^{2+}$<br>/ % | $[\text{Pd}_6\mathbf{1}^S_{12}]^{12+}$<br>/ % | $\text{Py}^*$<br>/ % | <b>Int</b><br>/ % | $\langle a \rangle$ | $\langle b \rangle$ | $\langle c \rangle$ | $\langle n \rangle$ | $\langle k \rangle$ |
|---------------|-----------------------|---------------------------------|-----------------------------------------------|----------------------|-------------------|---------------------|---------------------|---------------------|---------------------|---------------------|
| 0             | 100                   | 100                             | 0                                             | 0                    | 0                 | —                   | —                   | —                   | —                   | —                   |
| 5             | 0.0                   | 0.0                             | 0.0                                           | 68.7                 | 100.0             | 0.240               | 0.480               | 0.301               | 1.374               | 0.500               |
| 10            | 0.0                   | 0.0                             | 0.0                                           | 80.4                 | 100.0             | 0.240               | 0.480               | 0.188               | 1.608               | 0.500               |
| 15            | 0.0                   | 0.0                             | 0.0                                           | 86.4                 | 100.0             | 0.240               | 0.480               | 0.131               | 1.728               | 0.500               |
| 20            | 0.0                   | 0.0                             | 0.0                                           | 91.1                 | 100.0             | 0.240               | 0.480               | 0.085               | 1.823               | 0.500               |
| 25            | 0.0                   | 0.0                             | 0.0                                           | 92.2                 | 100.0             | 0.240               | 0.480               | 0.075               | 1.843               | 0.500               |
| 30            | 0.0                   | 0.0                             | 0.0                                           | 92.7                 | 100.0             | 0.240               | 0.480               | 0.070               | 1.853               | 0.500               |
| 35            | 0.0                   | 0.0                             | 0.0                                           | 91.7                 | 100.0             | 0.240               | 0.480               | 0.080               | 1.833               | 0.500               |
| 40            | 0.0                   | 0.0                             | 0.0                                           | 95.3                 | 100.0             | 0.240               | 0.480               | 0.045               | 1.907               | 0.500               |
| 45            | 0.0                   | 0.0                             | 0.0                                           | 96.2                 | 100.0             | 0.240               | 0.480               | 0.036               | 1.924               | 0.500               |
| 50            | 0.0                   | 0.0                             | 0.0                                           | 94.0                 | 100.0             | 0.240               | 0.480               | 0.057               | 1.881               | 0.500               |
| 55            | 0.0                   | 0.0                             | 0.0                                           | 95.4                 | 100.0             | 0.240               | 0.480               | 0.044               | 1.907               | 0.500               |
| 60            | 0.0                   | 0.0                             | 4.5                                           | 95.7                 | 95.5              | 0.229               | 0.458               | 0.041               | 1.910               | 0.500               |
| 120           | 0.0                   | 0.0                             | 8.7                                           | 99.1                 | 91.3              | 0.219               | 0.438               | 0.008               | 1.981               | 0.500               |
| 180           | 0.0                   | 0.0                             | 14.3                                          | 97.3                 | 85.7              | 0.206               | 0.411               | 0.026               | 1.937               | 0.500               |
| 240           | 0.0                   | 0.0                             | 15.4                                          | 96.6                 | 84.6              | 0.203               | 0.406               | 0.032               | 1.921               | 0.500               |
| 300           | 0.0                   | 0.0                             | 16.7                                          | 96.4                 | 83.3              | 0.200               | 0.400               | 0.035               | 1.913               | 0.500               |
| 360           | 0.0                   | 0.0                             | 19.9                                          | 96.5                 | 80.1              | 0.192               | 0.384               | 0.034               | 1.912               | 0.500               |
| 420           | 0.0                   | 0.0                             | 19.7                                          | 96.2                 | 80.3              | 0.193               | 0.385               | 0.037               | 1.904               | 0.500               |
| 480           | 0.0                   | 0.0                             | 22.8                                          | 97.5                 | 77.2              | 0.185               | 0.371               | 0.024               | 1.936               | 0.500               |
| 540           | 0.0                   | 0.0                             | 22.4                                          | 95.1                 | 77.6              | 0.186               | 0.373               | 0.047               | 1.873               | 0.500               |
| 720           | 0.0                   | 0.0                             | 28.6                                          | 96.5                 | 71.4              | 0.171               | 0.343               | 0.034               | 1.901               | 0.500               |
| 1440          | 0.0                   | 0.0                             | 43.0                                          | 99.0                 | 57.0              | 0.137               | 0.273               | 0.009               | 1.965               | 0.500               |
| 2160          | 0.0                   | 0.0                             | 49.3                                          | 98.8                 | 50.7              | 0.122               | 0.243               | 0.011               | 1.953               | 0.500               |
| 2880          | 0.0                   | 0.0                             | 56.1                                          | 98.9                 | 43.9              | 0.105               | 0.211               | 0.010               | 1.950               | 0.500               |
| 3600          | 0.0                   | 0.0                             | 60.0                                          | 98.2                 | 40.0              | 0.096               | 0.192               | 0.017               | 1.912               | 0.500               |
| 4320          | 0.0                   | 0.0                             | 64.0                                          | 99.3                 | 36.0              | 0.086               | 0.173               | 0.006               | 1.963               | 0.500               |
| 5040          | 0.0                   | 0.0                             | 65.9                                          | 99.2                 | 34.1              | 0.082               | 0.163               | 0.008               | 1.952               | 0.500               |
| 5760          | 0.0                   | 0.0                             | 69.9                                          | 100.1                | 30.1              | 0.072               | 0.145               | 0.001               | 2.009               | 0.500               |
| 6480          | 0.0                   | 0.0                             | 71.6                                          | 99.8                 | 28.4              | 0.068               | 0.136               | 0.002               | 1.987               | 0.500               |
| 14400         | 0.0                   | 0.0                             | 78.8                                          | 98.2                 | 21.2              | 0.051               | 0.102               | 0.017               | 1.830               | 0.500               |
| 20160         | 0.0                   | 0.0                             | 81.7                                          | 99.4                 | 18.3              | 0.044               | 0.088               | 0.006               | 1.930               | 0.500               |
| 30240         | 0.0                   | 0.0                             | 83.4                                          | 99.2                 | 16.6              | 0.040               | 0.080               | 0.008               | 1.903               | 0.500               |
| 40320         | 0.0                   | 0.0                             | 84.7                                          | 99.2                 | 15.3              | 0.037               | 0.073               | 0.008               | 1.890               | 0.500               |
| 50400         | 0.0                   | 0.0                             | 86.6                                          | 99.2                 | 13.4              | 0.032               | 0.064               | 0.008               | 1.875               | 0.500               |

**Table S4.** Time variation of  $\mathbf{1}^S$ ,  $[\text{PdPy}^*_4](\text{BF}_4)_2$ ,  $[\text{Pd}_6\mathbf{1}^S_{12}](\text{BF}_4)_{12}$ ,  $\text{Py}^*$ , and  $\mathbf{Int}$ ;  $\langle a \rangle$ – $\langle c \rangle$  values of the average composition of the intermediates ( $[\text{Pd}_{\langle a \rangle}\mathbf{1}^S_{\langle b \rangle}\text{Py}^*_{\langle c \rangle}]^{2\langle a \rangle+}$ );  $\langle n \rangle$ ,  $\langle k \rangle$  values for the self-assembly of  $[\text{Pd}_6\mathbf{1}^S_{12}](\text{BF}_4)_{12}$  from  $\mathbf{1}^S$  and  $[\text{PdPy}^*_4](\text{BF}_4)_2$  in  $\text{CD}_3\text{NO}_2$  at 298 K ( $[\mathbf{1}^S]_0 = 1.9 \text{ mM}$ ). (run 2)

| Time<br>/ min | $\mathbf{1}^S$<br>/ % | $[\text{PdPy}^*_4]^{2+}$<br>/ % | $[\text{Pd}_6\mathbf{1}^S_{12}]^{12+}$<br>/ % | $\text{Py}^*$<br>/ % | $\mathbf{Int}$<br>/ % | $\langle a \rangle$ | $\langle b \rangle$ | $\langle c \rangle$ | $\langle n \rangle$ | $\langle k \rangle$ |
|---------------|-----------------------|---------------------------------|-----------------------------------------------|----------------------|-----------------------|---------------------|---------------------|---------------------|---------------------|---------------------|
| 0             | 100                   | 100                             | 0                                             | 0                    | 0                     | —                   | —                   | —                   | —                   | —                   |
| 5             | 0.0                   | 0.0                             | 0.0                                           | 67.5                 | 100.0                 | 0.232               | 0.464               | 0.301               | 1.351               | 0.500               |
| 10            | 0.0                   | 0.0                             | 0.0                                           | 82.1                 | 100.0                 | 0.232               | 0.464               | 0.166               | 1.642               | 0.500               |
| 15            | 0.0                   | 0.0                             | 0.0                                           | 84.7                 | 100.0                 | 0.232               | 0.464               | 0.142               | 1.693               | 0.500               |
| 20            | 0.0                   | 0.0                             | 0.0                                           | 88.8                 | 100.0                 | 0.232               | 0.464               | 0.104               | 1.777               | 0.500               |
| 25            | 0.0                   | 0.0                             | 0.0                                           | 95.4                 | 100.0                 | 0.232               | 0.464               | 0.043               | 1.908               | 0.500               |
| 30            | 0.0                   | 0.0                             | 0.0                                           | 96.8                 | 100.0                 | 0.232               | 0.464               | 0.030               | 1.936               | 0.500               |
| 35            | 0.0                   | 0.0                             | 0.0                                           | 97.2                 | 100.0                 | 0.232               | 0.464               | 0.026               | 1.943               | 0.500               |
| 40            | 0.0                   | 0.0                             | 0.0                                           | 95.1                 | 100.0                 | 0.232               | 0.464               | 0.046               | 1.902               | 0.500               |
| 45            | 0.0                   | 0.0                             | 0.0                                           | 94.1                 | 100.0                 | 0.232               | 0.464               | 0.055               | 1.881               | 0.500               |
| 50            | 0.0                   | 0.0                             | 0.0                                           | 97.9                 | 100.0                 | 0.232               | 0.464               | 0.019               | 1.958               | 0.500               |
| 55            | 0.0                   | 0.0                             | 0.0                                           | 95.3                 | 100.0                 | 0.232               | 0.464               | 0.044               | 1.905               | 0.500               |
| 60            | 0.0                   | 0.0                             | 6.3                                           | 98.1                 | 93.7                  | 0.217               | 0.434               | 0.018               | 1.958               | 0.500               |
| 120           | 0.0                   | 0.0                             | 6.6                                           | 92.2                 | 93.4                  | 0.217               | 0.433               | 0.072               | 1.833               | 0.500               |
| 180           | 0.0                   | 0.0                             | 13.3                                          | 94.3                 | 86.7                  | 0.201               | 0.402               | 0.053               | 1.869               | 0.500               |
| 240           | 0.0                   | 0.0                             | 15.9                                          | 96.3                 | 84.1                  | 0.195               | 0.390               | 0.034               | 1.913               | 0.500               |
| 300           | 0.0                   | 0.0                             | 19.9                                          | 99.0                 | 80.1                  | 0.186               | 0.372               | 0.009               | 1.975               | 0.500               |
| 360           | 0.0                   | 0.0                             | 20.7                                          | 96.0                 | 79.3                  | 0.184               | 0.368               | 0.037               | 1.899               | 0.500               |
| 420           | 0.0                   | 0.0                             | 22.1                                          | 97.5                 | 77.9                  | 0.181               | 0.361               | 0.023               | 1.937               | 0.500               |
| 480           | 0.0                   | 0.0                             | 24.2                                          | 97.9                 | 75.8                  | 0.176               | 0.352               | 0.020               | 1.944               | 0.500               |
| 540           | 0.0                   | 0.0                             | 24.8                                          | 96.5                 | 75.2                  | 0.174               | 0.349               | 0.032               | 1.907               | 0.500               |
| 720           | 0.0                   | 0.0                             | 30.2                                          | 95.2                 | 69.8                  | 0.162               | 0.324               | 0.045               | 1.862               | 0.500               |
| 1440          | 0.0                   | 0.0                             | 45.7                                          | 95.3                 | 54.3                  | 0.126               | 0.252               | 0.044               | 1.825               | 0.500               |
| 2160          | 0.0                   | 0.0                             | 54.5                                          | 96.5                 | 45.5                  | 0.105               | 0.211               | 0.033               | 1.844               | 0.500               |
| 2880          | 0.0                   | 0.0                             | 63.4                                          | 97.6                 | 36.6                  | 0.085               | 0.170               | 0.022               | 1.869               | 0.500               |
| 3600          | 0.0                   | 0.0                             | 69.6                                          | 99.8                 | 30.4                  | 0.071               | 0.141               | 0.002               | 1.989               | 0.500               |
| 4320          | 0.0                   | 0.0                             | 72.1                                          | 98.8                 | 27.9                  | 0.065               | 0.129               | 0.011               | 1.912               | 0.500               |
| 5040          | 0.0                   | 0.0                             | 74.4                                          | 98.2                 | 25.6                  | 0.059               | 0.119               | 0.017               | 1.860               | 0.500               |
| 5760          | 0.0                   | 0.0                             | 75.0                                          | 98.8                 | 25.0                  | 0.058               | 0.116               | 0.011               | 1.902               | 0.500               |
| 6480          | 0.0                   | 0.0                             | 78.5                                          | 98.8                 | 21.5                  | 0.050               | 0.100               | 0.011               | 1.890               | 0.500               |
| 14400         | 0.0                   | 0.0                             | 88.9                                          | 98.6                 | 11.1                  | 0.026               | 0.052               | 0.013               | 1.741               | 0.500               |
| 20160         | 0.0                   | 0.0                             | 90.5                                          | 99.0                 | 9.5                   | 0.022               | 0.044               | 0.010               | 1.780               | 0.500               |
| 30240         | 0.0                   | 0.0                             | 93.2                                          | 98.8                 | 6.8                   | 0.016               | 0.032               | 0.011               | 1.663               | 0.500               |
| 40320         | 0.0                   | 0.0                             | 94.2                                          | 99.0                 | 5.8                   | 0.013               | 0.027               | 0.009               | 1.668               | 0.500               |
| 50400         | 0.0                   | 0.0                             | 94.2                                          | 99.0                 | 5.8                   | 0.013               | 0.027               | 0.009               | 1.668               | 0.500               |

**Table S5.** Time variation of  $\mathbf{1}^S$ ,  $[\text{PdPy}^*_4](\text{BF}_4)_2$ ,  $[\text{Pd}_6\mathbf{1}^S_{12}](\text{BF}_4)_{12}$ ,  $\text{Py}^*$ , and  $\mathbf{Int}$ ;  $\langle a \rangle$ – $\langle c \rangle$  values of the average composition of the intermediates ( $[\text{Pd}_{\langle a \rangle}\mathbf{1}^S_{\langle b \rangle}\text{Py}^*_{\langle c \rangle}]^{2\langle a \rangle+}$ ); ( $\langle n \rangle$ ,  $\langle k \rangle$ ) values for the self-assembly of  $[\text{Pd}_6\mathbf{1}^S_{12}](\text{BF}_4)_{12}$  from  $\mathbf{1}^S$  and  $[\text{PdPy}^*_4](\text{BF}_4)_2$  in  $\text{CD}_3\text{NO}_2$  at 298 K ( $[\mathbf{1}^S]_0 = 2.0 \text{ mM}$ ). (run 3)

| Time<br>/ min | $\mathbf{1}^S$<br>/ % | $[\text{PdPy}^*_4]^{2+}$<br>/ % | $[\text{Pd}_6\mathbf{1}^S_{12}]^{12+}$<br>/ % | $\text{Py}^*$<br>/ % | $\mathbf{Int}$<br>/ % | $\langle a \rangle$ | $\langle b \rangle$ | $\langle c \rangle$ | $\langle n \rangle$ | $\langle k \rangle$ |
|---------------|-----------------------|---------------------------------|-----------------------------------------------|----------------------|-----------------------|---------------------|---------------------|---------------------|---------------------|---------------------|
| 0             | 100                   | 100                             | 0                                             | 0                    | 0                     | —                   | —                   | —                   | —                   | —                   |
| 5             | 0.0                   | 0.0                             | 0.0                                           | 66.2                 | 100.0                 | 0.249               | 0.498               | 0.337               | 1.324               | 0.500               |
| 10            | 0.0                   | 0.0                             | 0.0                                           | 78.3                 | 100.0                 | 0.249               | 0.498               | 0.216               | 1.567               | 0.500               |
| 15            | 0.0                   | 0.0                             | 0.0                                           | 85.7                 | 100.0                 | 0.249               | 0.498               | 0.142               | 1.714               | 0.500               |
| 20            | 0.0                   | 0.0                             | 0.0                                           | 87.3                 | 100.0                 | 0.249               | 0.498               | 0.127               | 1.745               | 0.500               |
| 25            | 0.0                   | 0.0                             | 0.0                                           | 90.6                 | 100.0                 | 0.249               | 0.498               | 0.094               | 1.812               | 0.500               |
| 30            | 0.0                   | 0.0                             | 0.0                                           | 95.3                 | 100.0                 | 0.249               | 0.498               | 0.046               | 1.907               | 0.500               |
| 35            | 0.0                   | 0.0                             | 0.0                                           | 93.5                 | 100.0                 | 0.249               | 0.498               | 0.065               | 1.870               | 0.500               |
| 40            | 0.0                   | 0.0                             | 0.0                                           | 98.1                 | 100.0                 | 0.249               | 0.498               | 0.019               | 1.961               | 0.500               |
| 45            | 0.0                   | 0.0                             | 0.0                                           | 96.4                 | 100.0                 | 0.249               | 0.498               | 0.036               | 1.928               | 0.500               |
| 50            | 0.0                   | 0.0                             | 0.0                                           | 96.5                 | 100.0                 | 0.249               | 0.498               | 0.035               | 1.929               | 0.500               |
| 55            | 0.0                   | 0.0                             | 0.0                                           | 98.4                 | 100.0                 | 0.249               | 0.498               | 0.016               | 1.968               | 0.500               |
| 60            | 0.0                   | 0.0                             | 7.9                                           | 97.9                 | 92.1                  | 0.229               | 0.459               | 0.021               | 1.954               | 0.500               |
| 120           | 0.0                   | 0.0                             | 10.7                                          | 97.4                 | 89.3                  | 0.222               | 0.445               | 0.026               | 1.941               | 0.500               |
| 180           | 0.0                   | 0.0                             | 13.4                                          | 95.2                 | 86.6                  | 0.216               | 0.431               | 0.047               | 1.890               | 0.500               |
| 240           | 0.0                   | 0.0                             | 15.2                                          | 98.4                 | 84.8                  | 0.211               | 0.422               | 0.016               | 1.963               | 0.500               |
| 300           | 0.0                   | 0.0                             | 15.9                                          | 96.6                 | 84.1                  | 0.209               | 0.419               | 0.034               | 1.919               | 0.500               |
| 360           | 0.0                   | 0.0                             | 20.8                                          | 100.2                | 79.2                  | 0.197               | 0.395               | 0.002               | 2.005               | 0.500               |
| 420           | 0.0                   | 0.0                             | 20.0                                          | 98.6                 | 80.0                  | 0.199               | 0.398               | 0.014               | 1.965               | 0.500               |
| 480           | 0.0                   | 0.0                             | 20.6                                          | 100.1                | 79.4                  | 0.198               | 0.396               | 0.001               | 2.001               | 0.500               |
| 540           | 0.0                   | 0.0                             | 23.1                                          | 98.5                 | 76.9                  | 0.191               | 0.383               | 0.015               | 1.962               | 0.500               |
| 720           | 0.0                   | 0.0                             | 27.9                                          | 98.1                 | 72.1                  | 0.179               | 0.359               | 0.019               | 1.946               | 0.500               |
| 1440          | 0.0                   | 0.0                             | 41.5                                          | 99.5                 | 58.5                  | 0.146               | 0.292               | 0.005               | 1.985               | 0.500               |
| 2160          | 0.0                   | 0.0                             | 49.8                                          | 98.7                 | 50.2                  | 0.125               | 0.250               | 0.013               | 1.950               | 0.500               |
| 2880          | 0.0                   | 0.0                             | 55.5                                          | 98.9                 | 44.5                  | 0.111               | 0.222               | 0.011               | 1.951               | 0.500               |
| 3600          | 0.0                   | 0.0                             | 60.0                                          | 98.9                 | 40.0                  | 0.100               | 0.199               | 0.011               | 1.944               | 0.500               |
| 4320          | 0.0                   | 0.0                             | 62.0                                          | 98.4                 | 38.0                  | 0.095               | 0.189               | 0.016               | 1.917               | 0.500               |
| 5040          | 0.0                   | 0.0                             | 64.5                                          | 98.7                 | 35.5                  | 0.088               | 0.177               | 0.013               | 1.927               | 0.500               |
| 5760          | 0.0                   | 0.0                             | 67.8                                          | 99.3                 | 32.2                  | 0.080               | 0.161               | 0.007               | 1.958               | 0.500               |
| 6480          | 0.0                   | 0.0                             | 70.7                                          | 99.3                 | 29.3                  | 0.073               | 0.146               | 0.007               | 1.949               | 0.500               |
| 14400         | 0.0                   | 0.0                             | 82.9                                          | 99.5                 | 17.1                  | 0.043               | 0.085               | 0.005               | 1.941               | 0.500               |
| 20160         | 0.0                   | 0.0                             | 85.2                                          | 99.7                 | 14.8                  | 0.037               | 0.074               | 0.003               | 1.965               | 0.500               |
| 30240         | 0.0                   | 0.0                             | 85.6                                          | 99.8                 | 14.4                  | 0.036               | 0.072               | 0.002               | 1.967               | 0.500               |
| 40320         | 0.0                   | 0.0                             | 86.7                                          | 99.0                 | 13.3                  | 0.033               | 0.066               | 0.010               | 1.844               | 0.500               |
| 50400         | 0.0                   | 0.0                             | 90.3                                          | 99.0                 | 9.7                   | 0.024               | 0.048               | 0.010               | 1.786               | 0.500               |

**Table S6.** Average time variation of **2**, [PdPy\*<sub>4</sub>](BF<sub>4</sub>)<sub>2</sub>, [Pd<sub>6</sub>**2**<sub>12</sub>](BF<sub>4</sub>)<sub>12</sub>, Py\*, and **Int**;  $\langle a \rangle$ – $\langle c \rangle$  values of the average composition of the intermediates ([Pd<sub>(a)</sub>**2**<sub>(b)</sub>Py\*<sub>(c)</sub>]<sup>2(a)+</sup>); ( $\langle n \rangle$ ,  $\langle k \rangle$ ) values for the self-assembly of [Pd<sub>6</sub>**2**<sub>12</sub>](BF<sub>4</sub>)<sub>12</sub> from **2** and [PdPy\*<sub>4</sub>](BF<sub>4</sub>)<sub>2</sub> in CD<sub>3</sub>NO<sub>2</sub> and CD<sub>2</sub>Cl<sub>2</sub> (4:1, v/v) at 298 K ([**2**]<sub>0</sub> = ca. 2.2 mM).

| Time<br>/ min | <b>2</b><br>/ % | [PdPy* <sub>4</sub> ] <sup>2+</sup><br>/ % | [Pd <sub>6</sub> <b>2</b> <sub>12</sub> ] <sup>12+</sup><br>/ % | Py*<br>/ % | <b>Int</b><br>/ % | $\langle a \rangle$ | $\langle b \rangle$ | $\langle c \rangle$ | $\langle n \rangle$ | $\langle k \rangle$ |
|---------------|-----------------|--------------------------------------------|-----------------------------------------------------------------|------------|-------------------|---------------------|---------------------|---------------------|---------------------|---------------------|
| 0             | 100.0           | 100.0                                      | 0.0                                                             | 0.0        | 0.0               | —                   | —                   | —                   | —                   | —                   |
| 5             | 0.0             | 0.0                                        | 0.0                                                             | 83.8       | 100.0             | 0.286               | 0.572               | 0.189               | 1.676               | 0.500               |
| 10            | 0.0             | 0.0                                        | 0.0                                                             | 90.8       | 100.0             | 0.286               | 0.572               | 0.110               | 1.816               | 0.500               |
| 15            | 0.0             | 0.0                                        | 1.4                                                             | 92.0       | 98.6              | 0.282               | 0.564               | 0.097               | 1.839               | 0.500               |
| 20            | 0.0             | 0.0                                        | 3.2                                                             | 94.6       | 96.8              | 0.276               | 0.553               | 0.064               | 1.889               | 0.500               |
| 25            | 0.0             | 0.0                                        | 3.2                                                             | 99.5       | 96.8              | 0.276               | 0.553               | 0.005               | 1.990               | 0.500               |
| 30            | 0.0             | 0.0                                        | 3.5                                                             | 99.1       | 96.5              | 0.275               | 0.551               | 0.010               | 1.982               | 0.500               |
| 35            | 0.0             | 0.0                                        | 3.8                                                             | 98.5       | 96.2              | 0.274               | 0.549               | 0.017               | 1.969               | 0.500               |
| 40            | 0.0             | 0.0                                        | 5.3                                                             | 99.2       | 94.7              | 0.270               | 0.541               | 0.008               | 1.984               | 0.500               |
| 45            | 0.0             | 0.0                                        | 5.7                                                             | 98.9       | 94.3              | 0.269               | 0.538               | 0.012               | 1.977               | 0.500               |
| 50            | 0.0             | 0.0                                        | 6.4                                                             | 99.0       | 93.6              | 0.267               | 0.534               | 0.010               | 1.979               | 0.500               |
| 55            | 0.0             | 0.0                                        | 6.8                                                             | 99.6       | 93.2              | 0.266               | 0.532               | 0.005               | 1.990               | 0.500               |
| 60            | 0.0             | 0.0                                        | 7.9                                                             | 98.6       | 92.1              | 0.263               | 0.526               | 0.015               | 1.971               | 0.500               |
| 120           | 0.0             | 0.0                                        | 11.2                                                            | 98.4       | 88.8              | 0.253               | 0.506               | 0.017               | 1.965               | 0.500               |
| 180           | 0.0             | 0.0                                        | 13.8                                                            | 98.7       | 86.2              | 0.245               | 0.491               | 0.015               | 1.969               | 0.500               |
| 240           | 0.0             | 0.0                                        | 17.4                                                            | 99.5       | 82.6              | 0.234               | 0.469               | 0.006               | 1.988               | 0.500               |
| 300           | 0.0             | 0.0                                        | 19.1                                                            | 99.3       | 80.9              | 0.229               | 0.459               | 0.007               | 1.985               | 0.500               |
| 360           | 0.0             | 0.0                                        | 21.1                                                            | 98.4       | 78.9              | 0.224               | 0.448               | 0.017               | 1.962               | 0.500               |
| 720           | 0.0             | 0.0                                        | 29.0                                                            | 99.0       | 71.0              | 0.200               | 0.401               | 0.012               | 1.969               | 0.500               |
| 1440          | 0.0             | 0.0                                        | 40.1                                                            | 98.4       | 59.9              | 0.168               | 0.336               | 0.018               | 1.943               | 0.500               |
| 2880          | 0.0             | 0.0                                        | 52.8                                                            | 99.3       | 47.2              | 0.132               | 0.265               | 0.007               | 1.990               | 0.500               |
| 4320          | 0.0             | 0.0                                        | 61.2                                                            | 99.4       | 38.8              | 0.109               | 0.219               | 0.007               | 1.972               | 0.500               |
| 5760          | 0.0             | 0.0                                        | 65.2                                                            | 99.4       | 34.8              | 0.098               | 0.197               | 0.007               | 1.968               | 0.500               |
| 7200          | 0.0             | 0.0                                        | 66.6                                                            | 99.4       | 33.4              | 0.095               | 0.189               | 0.007               | 1.966               | 0.500               |
| 10080         | 0.0             | 0.0                                        | 66.6                                                            | 99.4       | 33.4              | 0.095               | 0.190               | 0.007               | 1.966               | 0.500               |

**Table S7.** Standard errors for each time point of **2**, [PdPy\*<sub>4</sub>](BF<sub>4</sub>)<sub>2</sub>, [Pd<sub>6</sub>**2**<sub>12</sub>](BF<sub>4</sub>)<sub>12</sub>, Py\*, and **Int**;  $\langle a \rangle$ – $\langle c \rangle$  values of the average composition of the intermediates ([Pd<sub>(a)</sub>**2**<sub>(b)</sub>Py\*<sub>(c)</sub>]<sup>2(a)+</sup>); ( $\langle n \rangle$ ,  $\langle k \rangle$ ) values for the self-assembly of [Pd<sub>6</sub>**2**<sub>12</sub>](BF<sub>4</sub>)<sub>12</sub> from **2** and [PdPy\*<sub>4</sub>](BF<sub>4</sub>)<sub>2</sub> in CD<sub>3</sub>NO<sub>2</sub> and CD<sub>2</sub>Cl<sub>2</sub> (4:1, v/v) at 298 K ([**2**]<sub>0</sub> = ca. 2.2 mM)

| Time<br>/ min | <b>2</b><br>/ % | [PdPy* <sub>4</sub> ] <sup>2+</sup><br>/ % | [Pd <sub>6</sub> <b>2</b> <sub>12</sub> ] <sup>12+</sup><br>/ % | Py*<br>/ % | <b>Int</b><br>/ % | $\langle a \rangle$ | $\langle b \rangle$ | $\langle c \rangle$ | $\langle n \rangle$ | $\langle k \rangle$ |
|---------------|-----------------|--------------------------------------------|-----------------------------------------------------------------|------------|-------------------|---------------------|---------------------|---------------------|---------------------|---------------------|
| 0             | 0               | 0                                          | 0.00                                                            | 0.00       | 0.00              | —                   | —                   | —                   | —                   | —                   |
| 5             | 0               | 0                                          | 0.00                                                            | 3.11       | 0.00              | 0.015               | 0.029               | 0.047               | 0.062               | 0.000               |
| 10            | 0               | 0                                          | 0.00                                                            | 4.45       | 0.00              | 0.015               | 0.029               | 0.058               | 0.089               | 0.000               |
| 15            | 0               | 0                                          | 1.39                                                            | 4.59       | 1.39              | 0.017               | 0.034               | 0.059               | 0.091               | 0.000               |
| 20            | 0               | 0                                          | 1.64                                                            | 2.36       | 1.64              | 0.013               | 0.027               | 0.031               | 0.049               | 0.000               |
| 25            | 0               | 0                                          | 1.60                                                            | 0.37       | 1.60              | 0.012               | 0.025               | 0.004               | 0.007               | 0.000               |
| 30            | 0               | 0                                          | 1.77                                                            | 0.20       | 1.77              | 0.012               | 0.025               | 0.002               | 0.004               | 0.000               |
| 35            | 0               | 0                                          | 2.02                                                            | 0.52       | 2.02              | 0.010               | 0.021               | 0.005               | 0.011               | 0.000               |
| 40            | 0               | 0                                          | 1.12                                                            | 0.43       | 1.12              | 0.012               | 0.024               | 0.005               | 0.009               | 0.000               |
| 45            | 0               | 0                                          | 0.89                                                            | 0.38       | 0.89              | 0.011               | 0.023               | 0.004               | 0.008               | 0.000               |
| 50            | 0               | 0                                          | 1.65                                                            | 1.38       | 1.65              | 0.009               | 0.018               | 0.015               | 0.029               | 0.000               |
| 55            | 0               | 0                                          | 1.36                                                            | 0.21       | 1.36              | 0.010               | 0.019               | 0.002               | 0.004               | 0.000               |
| 60            | 0               | 0                                          | 1.05                                                            | 0.51       | 1.05              | 0.010               | 0.021               | 0.005               | 0.011               | 0.000               |
| 120           | 0               | 0                                          | 2.01                                                            | 0.55       | 2.01              | 0.007               | 0.014               | 0.006               | 0.012               | 0.000               |
| 180           | 0               | 0                                          | 3.84                                                            | 0.65       | 3.84              | 0.001               | 0.002               | 0.007               | 0.015               | 0.000               |
| 240           | 0               | 0                                          | 5.94                                                            | 0.70       | 5.94              | 0.006               | 0.012               | 0.008               | 0.016               | 0.000               |
| 300           | 0               | 0                                          | 5.97                                                            | 0.66       | 5.97              | 0.006               | 0.012               | 0.007               | 0.016               | 0.000               |
| 360           | 0               | 0                                          | 6.05                                                            | 0.87       | 6.05              | 0.007               | 0.014               | 0.009               | 0.019               | 0.000               |
| 720           | 0               | 0                                          | 8.93                                                            | 1.00       | 8.93              | 0.017               | 0.033               | 0.011               | 0.026               | 0.000               |
| 1440          | 0               | 0                                          | 10.18                                                           | 0.63       | 10.18             | 0.022               | 0.044               | 0.007               | 0.021               | 0.000               |
| 2880          | 0               | 0                                          | 9.55                                                            | 0.95       | 9.55              | 0.022               | 0.044               | 0.011               | 0.046               | 0.000               |
| 4320          | 0               | 0                                          | 5.63                                                            | 0.35       | 5.63              | 0.011               | 0.023               | 0.004               | 0.017               | 0.000               |
| 5760          | 0               | 0                                          | 3.53                                                            | 0.35       | 3.53              | 0.006               | 0.011               | 0.004               | 0.018               | 0.000               |
| 7200          | 0               | 0                                          | 2.86                                                            | 0.35       | 2.86              | 0.004               | 0.008               | 0.004               | 0.019               | 0.000               |
| 10080         | 0               | 0                                          | 2.92                                                            | 0.35       | 2.92              | 0.004               | 0.008               | 0.004               | 0.019               | 0.000               |

**Table S8.** Time variation of **2**, [PdPy\*<sub>4</sub>](BF<sub>4</sub>)<sub>2</sub>, [Pd<sub>6</sub>**2**]<sub>12</sub>(BF<sub>4</sub>)<sub>12</sub>, Py\*, and **Int**;  $\langle a \rangle$ – $\langle c \rangle$  values of the average composition of the intermediates ([Pd<sub>(a)</sub>**2**<sub>(b)</sub>Py\*<sub>(c)</sub>]<sup>2(a)+</sup>); ( $\langle n \rangle$ ,  $\langle k \rangle$ ) values for the self-assembly of [Pd<sub>6</sub>**2**]<sub>12</sub>(BF<sub>4</sub>)<sub>12</sub> from **2** and [PdPy\*<sub>4</sub>](BF<sub>4</sub>)<sub>2</sub> in CD<sub>3</sub>NO<sub>2</sub> and CD<sub>2</sub>Cl<sub>2</sub> (4:1, v/v) at 298 K ([**2**]<sub>0</sub> = 2.1 mM). (run 4)

| Time<br>/ min | <b>2</b><br>/ % | [PdPy* <sub>4</sub> ] <sup>2+</sup><br>/ % | [Pd <sub>6</sub> <b>2</b> ] <sub>12</sub> <sup>12+</sup><br>/ % | Py*<br>/ % | <b>Int</b><br>/ % | $\langle a \rangle$ | $\langle b \rangle$ | $\langle c \rangle$ | $\langle n \rangle$ | $\langle k \rangle$ |
|---------------|-----------------|--------------------------------------------|-----------------------------------------------------------------|------------|-------------------|---------------------|---------------------|---------------------|---------------------|---------------------|
| 0             | 100.0           | 100.0                                      | 0.0                                                             | 0.0        | 0.0               | —                   | —                   | —                   | —                   | —                   |
| 5             | 0.0             | 0.0                                        | 0.0                                                             | 86.1       | 100.0             | 0.270               | 0.540               | 0.150               | 1.722               | 0.500               |
| 10            | 0.0             | 0.0                                        | 0.0                                                             | 97.8       | 100.0             | 0.270               | 0.540               | 0.024               | 1.956               | 0.500               |
| 15            | 0.0             | 0.0                                        | 4.2                                                             | 98.9       | 95.8              | 0.259               | 0.518               | 0.012               | 1.976               | 0.500               |
| 20            | 0.0             | 0.0                                        | 5.4                                                             | 97.8       | 94.6              | 0.255               | 0.511               | 0.024               | 1.954               | 0.500               |
| 25            | 0.0             | 0.0                                        | 4.6                                                             | 99.7       | 95.4              | 0.257               | 0.515               | 0.003               | 1.994               | 0.500               |
| 30            | 0.0             | 0.0                                        | 5.4                                                             | 99.1       | 94.6              | 0.255               | 0.511               | 0.010               | 1.981               | 0.500               |
| 35            | 0.0             | 0.0                                        | 4.6                                                             | 97.8       | 95.4              | 0.257               | 0.515               | 0.024               | 1.954               | 0.500               |
| 40            | 0.0             | 0.0                                        | 6.1                                                             | 99.1       | 93.9              | 0.254               | 0.507               | 0.010               | 1.980               | 0.500               |
| 45            | 0.0             | 0.0                                        | 5.4                                                             | 99.3       | 94.6              | 0.255               | 0.511               | 0.008               | 1.985               | 0.500               |
| 50            | 0.0             | 0.0                                        | 4.2                                                             | 99.9       | 95.8              | 0.259               | 0.517               | 0.001               | 1.999               | 0.500               |
| 55            | 0.0             | 0.0                                        | 5.5                                                             | 99.9       | 94.5              | 0.255               | 0.510               | 0.001               | 1.999               | 0.500               |
| 60            | 0.0             | 0.0                                        | 6.9                                                             | 98.7       | 93.1              | 0.251               | 0.503               | 0.014               | 1.971               | 0.500               |
| 120           | 0.0             | 0.0                                        | 8.9                                                             | 98.0       | 91.1              | 0.246               | 0.492               | 0.021               | 1.957               | 0.500               |
| 180           | 0.0             | 0.0                                        | 9.4                                                             | 99.9       | 90.6              | 0.244               | 0.489               | 0.001               | 1.999               | 0.500               |
| 240           | 0.0             | 0.0                                        | 11.6                                                            | 100.6      | 88.4              | 0.239               | 0.478               | -0.006              | 2.013               | 0.500               |
| 300           | 0.0             | 0.0                                        | 13.5                                                            | 98.7       | 86.5              | 0.233               | 0.467               | 0.014               | 1.969               | 0.500               |
| 360           | 0.0             | 0.0                                        | 16.9                                                            | 99.1       | 83.1              | 0.224               | 0.449               | 0.010               | 1.978               | 0.500               |
| 720           | 0.0             | 0.0                                        | 21.0                                                            | 100.8      | 79.0              | 0.213               | 0.427               | -0.009              | 2.020               | 0.500               |
| 1440          | 0.0             | 0.0                                        | 30.6                                                            | 99.5       | 69.4              | 0.187               | 0.375               | 0.005               | 1.986               | 0.500               |
| 2880          | 0.0             | 0.0                                        | 44.4                                                            | 98.9       | 55.6              | 0.150               | 0.301               | 0.012               | 1.959               | 0.500               |
| 4320          | 0.0             | 0.0                                        | 57.4                                                            | 98.9       | 42.6              | 0.115               | 0.230               | 0.012               | 1.947               | 0.500               |
| 5760          | 0.0             | 0.0                                        | 61.0                                                            | 98.9       | 39.0              | 0.105               | 0.211               | 0.012               | 1.942               | 0.500               |
| 7200          | 0.0             | 0.0                                        | 62.8                                                            | 98.9       | 37.2              | 0.100               | 0.201               | 0.012               | 1.939               | 0.500               |
| 10080         | 0.0             | 0.0                                        | 62.5                                                            | 98.9       | 37.5              | 0.101               | 0.203               | 0.012               | 1.940               | 0.500               |



**Table S9.** Time variation of **2**, [PdPy\*<sub>4</sub>](BF<sub>4</sub>)<sub>2</sub>, [Pd<sub>6</sub>**2**]<sub>12</sub>(BF<sub>4</sub>)<sub>12</sub>, Py\*, and **Int**;  $\langle a \rangle$ – $\langle c \rangle$  values of the average composition of the intermediates ([Pd<sub>(a)</sub>**2**<sub>(b)</sub>Py\*<sub>(c)</sub>]<sup>2(a)+</sup>); ( $\langle n \rangle$ ,  $\langle k \rangle$ ) values for the self-assembly of [Pd<sub>6</sub>**2**]<sub>12</sub>(BF<sub>4</sub>)<sub>12</sub> from **2** and [PdPy\*<sub>4</sub>](BF<sub>4</sub>)<sub>2</sub> in CD<sub>3</sub>NO<sub>2</sub> and CD<sub>2</sub>Cl<sub>2</sub> (4:1, v/v) at 298 K ([**2**]<sub>0</sub> = 2.1 mM). (run 5)

| Time<br>/ min | <b>2</b><br>/ % | [PdPy* <sub>4</sub> ] <sup>2+</sup><br>/ % | [Pd <sub>6</sub> <b>2</b> ] <sub>12</sub> <sup>12+</sup><br>/ % | Py*<br>/ % | <b>Int</b><br>/ % | $\langle a \rangle$ | $\langle b \rangle$ | $\langle c \rangle$ | $\langle n \rangle$ | $\langle k \rangle$ |
|---------------|-----------------|--------------------------------------------|-----------------------------------------------------------------|------------|-------------------|---------------------|---------------------|---------------------|---------------------|---------------------|
| 0             | 100.0           | 100.0                                      | 0.0                                                             | 0.0        | 0.0               | —                   | —                   | —                   | —                   | —                   |
| 5             | 0.0             | 0.0                                        | 0.0                                                             | 87.6       | 100.0             | 0.273               | 0.545               | 0.135               | 1.753               | 0.500               |
| 10            | 0.0             | 0.0                                        | 0.0                                                             | 92.1       | 100.0             | 0.273               | 0.545               | 0.087               | 1.841               | 0.500               |
| 15            | 0.0             | 0.0                                        | 0.0                                                             | 93.7       | 100.0             | 0.273               | 0.545               | 0.068               | 1.875               | 0.500               |
| 20            | 0.0             | 0.0                                        | 0.0                                                             | 96.1       | 100.0             | 0.273               | 0.545               | 0.043               | 1.921               | 0.500               |
| 25            | 0.0             | 0.0                                        | 0.0                                                             | 98.8       | 100.0             | 0.273               | 0.545               | 0.013               | 1.976               | 0.500               |
| 30            | 0.0             | 0.0                                        | 0.0                                                             | 98.8       | 100.0             | 0.273               | 0.545               | 0.013               | 1.976               | 0.500               |
| 35            | 0.0             | 0.0                                        | 0.0                                                             | 98.2       | 100.0             | 0.273               | 0.545               | 0.020               | 1.963               | 0.500               |
| 40            | 0.0             | 0.0                                        | 3.1                                                             | 98.6       | 96.9              | 0.264               | 0.528               | 0.015               | 1.971               | 0.500               |
| 45            | 0.0             | 0.0                                        | 4.4                                                             | 98.2       | 95.6              | 0.261               | 0.521               | 0.020               | 1.962               | 0.500               |
| 50            | 0.0             | 0.0                                        | 5.4                                                             | 96.3       | 94.6              | 0.258               | 0.516               | 0.041               | 1.921               | 0.500               |
| 55            | 0.0             | 0.0                                        | 5.4                                                             | 99.2       | 94.6              | 0.258               | 0.516               | 0.008               | 1.984               | 0.500               |
| 60            | 0.0             | 0.0                                        | 6.9                                                             | 97.8       | 93.1              | 0.254               | 0.508               | 0.025               | 1.952               | 0.500               |
| 120           | 0.0             | 0.0                                        | 9.6                                                             | 97.8       | 90.4              | 0.246               | 0.493               | 0.025               | 1.950               | 0.500               |
| 180           | 0.0             | 0.0                                        | 10.5                                                            | 97.8       | 89.5              | 0.244               | 0.488               | 0.025               | 1.950               | 0.500               |
| 240           | 0.0             | 0.0                                        | 11.4                                                            | 98.2       | 88.6              | 0.242               | 0.483               | 0.020               | 1.959               | 0.500               |
| 300           | 0.0             | 0.0                                        | 12.8                                                            | 98.6       | 87.2              | 0.238               | 0.476               | 0.015               | 1.968               | 0.500               |
| 360           | 0.0             | 0.0                                        | 13.4                                                            | 96.7       | 86.6              | 0.236               | 0.472               | 0.036               | 1.924               | 0.500               |
| 720           | 0.0             | 0.0                                        | 19.2                                                            | 97.3       | 80.8              | 0.220               | 0.441               | 0.029               | 1.934               | 0.500               |
| 1440          | 0.0             | 0.0                                        | 29.3                                                            | 97.3       | 70.7              | 0.193               | 0.386               | 0.029               | 1.925               | 0.500               |
| 2880          | 0.0             | 0.0                                        | 42.1                                                            | 98.0       | 57.9              | 0.158               | 0.316               | 0.022               | 1.930               | 0.500               |
| 4320          | 0.0             | 0.0                                        | 53.9                                                            | 99.2       | 46.1              | 0.126               | 0.252               | 0.008               | 1.966               | 0.500               |
| 5760          | 0.0             | 0.0                                        | 62.4                                                            | 99.2       | 37.6              | 0.103               | 0.205               | 0.008               | 1.959               | 0.500               |
| 7200          | 0.0             | 0.0                                        | 64.9                                                            | 99.2       | 35.1              | 0.096               | 0.192               | 0.008               | 1.956               | 0.500               |
| 10080         | 0.0             | 0.0                                        | 65.0                                                            | 99.2       | 35.0              | 0.096               | 0.191               | 0.008               | 1.956               | 0.500               |

**Table S10.** Time variation of **2**, [PdPy\*<sub>4</sub>](BF<sub>4</sub>)<sub>2</sub>, [Pd<sub>6</sub>**2**]<sub>12</sub>(BF<sub>4</sub>)<sub>12</sub>, Py\*, and **Int**;  $\langle a \rangle$ – $\langle c \rangle$  values of the average composition of the intermediates ([Pd <sub>$\langle a \rangle$</sub> **2** <sub>$\langle b \rangle$</sub> Py\* <sub>$\langle c \rangle$</sub> )<sup>2( $\langle a \rangle$ +)</sup> ; ( $\langle n \rangle$ ,  $\langle k \rangle$ ) values for the self-assembly of [Pd<sub>6</sub>**2**]<sub>12</sub>(BF<sub>4</sub>)<sub>12</sub> from **2** and [PdPy\*<sub>4</sub>](BF<sub>4</sub>)<sub>2</sub> in CD<sub>3</sub>NO<sub>2</sub> and CD<sub>2</sub>Cl<sub>2</sub> (4:1, v/v) at 298 K ([**2**]<sub>0</sub> = 2.4 mM). (run 6)

| Time<br>/ min | <b>2</b><br>/ % | [PdPy* <sub>4</sub> ] <sup>2+</sup><br>/ % | [Pd <sub>6</sub> <b>2</b> ] <sub>12</sub> <sup>12+</sup><br>/ % | Py*<br>/ % | <b>Int</b><br>/ % | $\langle a \rangle$ | $\langle b \rangle$ | $\langle c \rangle$ | $\langle n \rangle$ | $\langle k \rangle$ |
|---------------|-----------------|--------------------------------------------|-----------------------------------------------------------------|------------|-------------------|---------------------|---------------------|---------------------|---------------------|---------------------|
| 0             | 100.0           | 100.0                                      | 0.0                                                             | 0.0        | 0.0               | —                   | —                   | —                   | —                   | —                   |
| 5             | 0.0             | 0.0                                        | 0.0                                                             | 77.6       | 100.0             | 0.315               | 0.630               | 0.282               | 1.553               | 0.500               |
| 10            | 0.0             | 0.0                                        | 0.0                                                             | 82.6       | 100.0             | 0.315               | 0.630               | 0.220               | 1.651               | 0.500               |
| 15            | 0.0             | 0.0                                        | 0.0                                                             | 83.3       | 100.0             | 0.315               | 0.630               | 0.211               | 1.666               | 0.500               |
| 20            | 0.0             | 0.0                                        | 4.3                                                             | 90.0       | 95.7              | 0.302               | 0.603               | 0.126               | 1.792               | 0.500               |
| 25            | 0.0             | 0.0                                        | 5.0                                                             | 100.1      | 95.0              | 0.299               | 0.599               | -0.001              | 2.001               | 0.500               |
| 30            | 0.0             | 0.0                                        | 5.3                                                             | 99.5       | 94.7              | 0.298               | 0.597               | 0.006               | 1.990               | 0.500               |
| 35            | 0.0             | 0.0                                        | 6.9                                                             | 99.5       | 93.1              | 0.293               | 0.587               | 0.006               | 1.989               | 0.500               |
| 40            | 0.0             | 0.0                                        | 6.7                                                             | 100.1      | 93.3              | 0.294               | 0.588               | -0.001              | 2.001               | 0.500               |
| 45            | 0.0             | 0.0                                        | 7.4                                                             | 99.3       | 92.6              | 0.292               | 0.583               | 0.009               | 1.985               | 0.500               |
| 50            | 0.0             | 0.0                                        | 9.7                                                             | 100.8      | 90.3              | 0.285               | 0.569               | -0.010              | 2.017               | 0.500               |
| 55            | 0.0             | 0.0                                        | 9.5                                                             | 99.5       | 90.5              | 0.285               | 0.570               | 0.006               | 1.989               | 0.500               |
| 60            | 0.0             | 0.0                                        | 10.0                                                            | 99.5       | 90.0              | 0.284               | 0.567               | 0.006               | 1.989               | 0.500               |
| 120           | 0.0             | 0.0                                        | 15.2                                                            | 99.5       | 84.8              | 0.267               | 0.534               | 0.006               | 1.988               | 0.500               |
| 180           | 0.0             | 0.0                                        | 21.4                                                            | 98.4       | 78.6              | 0.248               | 0.495               | 0.020               | 1.960               | 0.500               |
| 240           | 0.0             | 0.0                                        | 29.3                                                            | 99.7       | 70.7              | 0.223               | 0.446               | 0.004               | 1.991               | 0.500               |
| 300           | 0.0             | 0.0                                        | 31.0                                                            | 100.6      | 69.0              | 0.217               | 0.435               | -0.008              | 2.017               | 0.500               |
| 360           | 0.0             | 0.0                                        | 33.0                                                            | 99.5       | 67.0              | 0.211               | 0.422               | 0.006               | 1.985               | 0.500               |
| 720           | 0.0             | 0.0                                        | 46.8                                                            | 98.8       | 53.2              | 0.168               | 0.335               | 0.015               | 1.954               | 0.500               |
| 1440          | 0.0             | 0.0                                        | 60.5                                                            | 98.4       | 39.5              | 0.125               | 0.249               | 0.020               | 1.920               | 0.500               |
| 2880          | 0.0             | 0.0                                        | 71.8                                                            | 101.1      | 28.2              | 0.089               | 0.178               | -0.014              | 2.081               | 0.500               |
| 4320          | 0.0             | 0.0                                        | 72.2                                                            | 100.1      | 27.8              | 0.088               | 0.175               | -0.001              | 2.004               | 0.500               |
| 5760          | 0.0             | 0.0                                        | 72.2                                                            | 100.1      | 27.8              | 0.088               | 0.175               | -0.001              | 2.004               | 0.500               |
| 7200          | 0.0             | 0.0                                        | 72.2                                                            | 100.1      | 27.8              | 0.088               | 0.175               | -0.001              | 2.004               | 0.500               |
| 10080         | 0.0             | 0.0                                        | 72.2                                                            | 100.1      | 27.8              | 0.088               | 0.175               | -0.001              | 2.004               | 0.500               |

**Table S11.** Average time variation of **3**, [PdPy\*<sub>4</sub>](BF<sub>4</sub>)<sub>2</sub>, [Pd<sub>6</sub>**3**<sub>12</sub>](BF<sub>4</sub>)<sub>12</sub>, Py\*, and **Int**;  $\langle a \rangle$ – $\langle c \rangle$  values of the average composition of the intermediates ([Pd<sub>(a)</sub>**3**<sub>(b)</sub>Py\*<sub>(c)</sub>]<sup>2(a)+</sup>); ( $\langle n \rangle$ ,  $\langle k \rangle$ ) values for the self-assembly of [Pd<sub>6</sub>**3**<sub>12</sub>](BF<sub>4</sub>)<sub>12</sub> from **3** and [PdPy\*<sub>4</sub>](BF<sub>4</sub>)<sub>2</sub> in CD<sub>3</sub>NO<sub>2</sub> and CD<sub>2</sub>Cl<sub>2</sub> (4:1, v/v) at 298 K ([**3**]<sub>0</sub> = ca. 2.2 mM).

| Time<br>/ min | <b>3</b><br>/ % | [PdPy* <sub>4</sub> ] <sup>2+</sup><br>/ % | [Pd <sub>6</sub> <b>3</b> <sub>12</sub> ] <sup>12+</sup><br>/ % | Py*<br>/ % | <b>Int</b><br>/ % | $\langle a \rangle$ | $\langle b \rangle$ | $\langle c \rangle$ | $\langle n \rangle$ | $\langle k \rangle$ |
|---------------|-----------------|--------------------------------------------|-----------------------------------------------------------------|------------|-------------------|---------------------|---------------------|---------------------|---------------------|---------------------|
| 0             | 100.0           | 100.0                                      | 0.0                                                             | 0.0        | 0.0               | —                   | —                   | —                   | —                   | —                   |
| 5             | 38.5            | 14.1                                       | 1.4                                                             | 50.6       | 60.0              | 0.242               | 0.344               | 0.401               | 1.634               | 0.706               |
| 10            | 19.3            | 4.3                                        | 2.8                                                             | 72.2       | 77.9              | 0.266               | 0.446               | 0.267               | 1.782               | 0.596               |
| 15            | 12.6            | 3.2                                        | 4.0                                                             | 80.5       | 83.4              | 0.266               | 0.478               | 0.184               | 1.834               | 0.556               |
| 20            | 10.4            | 2.9                                        | 5.1                                                             | 86.1       | 84.5              | 0.263               | 0.484               | 0.124               | 1.915               | 0.544               |
| 25            | 7.6             | 2.5                                        | 6.0                                                             | 88.0       | 86.5              | 0.262               | 0.495               | 0.107               | 1.897               | 0.530               |
| 30            | 7.0             | 2.3                                        | 6.6                                                             | 90.4       | 86.4              | 0.261               | 0.495               | 0.082               | 1.941               | 0.528               |
| 35            | 6.4             | 1.9                                        | 7.3                                                             | 91.7       | 86.3              | 0.260               | 0.494               | 0.072               | 1.956               | 0.527               |
| 40            | 5.7             | 2.4                                        | 8.0                                                             | 91.9       | 86.3              | 0.256               | 0.495               | 0.064               | 1.942               | 0.519               |
| 45            | 5.6             | 2.5                                        | 8.4                                                             | 91.9       | 86.0              | 0.255               | 0.493               | 0.062               | 1.943               | 0.518               |
| 50            | 5.3             | 1.7                                        | 9.0                                                             | 92.6       | 85.7              | 0.256               | 0.491               | 0.064               | 1.950               | 0.522               |
| 55            | 5.2             | 2.5                                        | 9.5                                                             | 93.4       | 85.2              | 0.252               | 0.489               | 0.046               | 1.966               | 0.516               |
| 60            | 5.1             | 2.5                                        | 10.3                                                            | 93.6       | 84.6              | 0.250               | 0.485               | 0.044               | 1.967               | 0.515               |
| 120           | 4.4             | 2.5                                        | 14.1                                                            | 93.9       | 81.5              | 0.239               | 0.467               | 0.039               | 1.957               | 0.512               |
| 180           | 3.4             | 2.0                                        | 17.0                                                            | 94.2       | 79.6              | 0.232               | 0.457               | 0.042               | 1.941               | 0.510               |
| 240           | 3.3             | 2.0                                        | 20.3                                                            | 94.6       | 76.4              | 0.223               | 0.438               | 0.038               | 1.946               | 0.509               |
| 300           | 3.1             | 2.0                                        | 23.0                                                            | 94.7       | 73.9              | 0.215               | 0.424               | 0.037               | 1.940               | 0.508               |
| 360           | 3.0             | 2.0                                        | 25.5                                                            | 94.8       | 71.5              | 0.208               | 0.410               | 0.036               | 1.938               | 0.508               |
| 720           | 2.7             | 1.6                                        | 32.5                                                            | 95.8       | 64.8              | 0.189               | 0.372               | 0.029               | 1.952               | 0.510               |
| 1440          | 2.4             | 1.6                                        | 41.0                                                            | 96.4       | 56.7              | 0.165               | 0.326               | 0.022               | 1.950               | 0.509               |
| 2880          | 2.3             | 1.6                                        | 46.8                                                            | 96.0       | 50.8              | 0.148               | 0.292               | 0.026               | 1.929               | 0.508               |
| 4320          | 2.3             | 1.7                                        | 48.7                                                            | 96.1       | 49.1              | 0.142               | 0.281               | 0.024               | 1.930               | 0.506               |
| 5760          | 2.1             | 1.7                                        | 48.8                                                            | 96.0       | 49.1              | 0.142               | 0.281               | 0.025               | 1.921               | 0.504               |

**Table S12.** Standard errors for each time point of **3**, [PdPy\*<sub>4</sub>](BF<sub>4</sub>)<sub>2</sub>, [Pd<sub>6</sub>**3**<sub>12</sub>](BF<sub>4</sub>)<sub>12</sub>, Py\*, and **Int**;  $\langle a \rangle$ – $\langle c \rangle$  values of the average composition of the intermediates ([Pd<sub>(a)</sub>**3**<sub>(b)</sub>Py\*<sub>(c)</sub>]<sup>2(a)+</sup>); ( $\langle n \rangle$ ,  $\langle k \rangle$ ) values for the self-assembly of [Pd<sub>6</sub>**3**<sub>12</sub>](BF<sub>4</sub>)<sub>12</sub> from **3** and [PdPy\*<sub>4</sub>](BF<sub>4</sub>)<sub>2</sub> in CD<sub>3</sub>NO<sub>2</sub> and CD<sub>2</sub>Cl<sub>2</sub> (4:1, v/v) at 298 K ([**3**]<sub>0</sub> = ca. 2.2 mM)

| Time<br>/ min | <b>3</b><br>/ % | [PdPy* <sub>4</sub> ] <sup>2+</sup><br>/ % | [Pd <sub>6</sub> <b>3</b> <sub>12</sub> ] <sup>12+</sup><br>/ % | Py*<br>/ % | <b>Int</b><br>/ % | $\langle a \rangle$ | $\langle b \rangle$ | $\langle c \rangle$ | $\langle n \rangle$ | $\langle k \rangle$ |
|---------------|-----------------|--------------------------------------------|-----------------------------------------------------------------|------------|-------------------|---------------------|---------------------|---------------------|---------------------|---------------------|
| 0             | 0.00            | 0.00                                       | 0.00                                                            | 0.00       | 0.00              | —                   | —                   | —                   | —                   | —                   |
| 5             | 2.80            | 1.08                                       | 0.06                                                            | 4.29       | 2.75              | 0.006               | 0.023               | 0.036               | 0.075               | 0.028               |
| 10            | 0.34            | 0.48                                       | 0.06                                                            | 3.34       | 0.30              | 0.006               | 0.013               | 0.033               | 0.078               | 0.005               |
| 15            | 0.59            | 0.55                                       | 0.13                                                            | 3.18       | 0.68              | 0.006               | 0.016               | 0.036               | 0.064               | 0.007               |
| 20            | 0.76            | 0.32                                       | 0.15                                                            | 2.59       | 0.77              | 0.006               | 0.017               | 0.028               | 0.048               | 0.006               |
| 25            | 1.37            | 0.28                                       | 0.32                                                            | 2.46       | 1.46              | 0.007               | 0.020               | 0.024               | 0.030               | 0.008               |
| 30            | 1.18            | 0.05                                       | 0.37                                                            | 2.64       | 1.34              | 0.008               | 0.020               | 0.028               | 0.035               | 0.007               |
| 35            | 1.23            | 0.62                                       | 0.57                                                            | 2.41       | 1.59              | 0.007               | 0.022               | 0.027               | 0.030               | 0.009               |
| 40            | 1.17            | 0.32                                       | 0.62                                                            | 2.31       | 1.36              | 0.008               | 0.020               | 0.024               | 0.031               | 0.007               |
| 45            | 1.19            | 0.26                                       | 0.66                                                            | 2.38       | 1.41              | 0.008               | 0.021               | 0.025               | 0.033               | 0.007               |
| 50            | 1.20            | 0.69                                       | 0.82                                                            | 2.34       | 1.46              | 0.008               | 0.021               | 0.028               | 0.037               | 0.007               |
| 55            | 1.17            | 0.26                                       | 0.82                                                            | 2.17       | 1.57              | 0.008               | 0.021               | 0.023               | 0.031               | 0.007               |
| 60            | 1.19            | 0.26                                       | 0.96                                                            | 1.87       | 1.54              | 0.008               | 0.021               | 0.020               | 0.026               | 0.007               |
| 120           | 0.88            | 0.26                                       | 1.68                                                            | 1.99       | 2.26              | 0.010               | 0.025               | 0.021               | 0.030               | 0.005               |
| 180           | 1.05            | 0.52                                       | 2.69                                                            | 1.72       | 3.68              | 0.012               | 0.032               | 0.019               | 0.027               | 0.009               |
| 240           | 1.01            | 0.50                                       | 2.85                                                            | 1.24       | 3.75              | 0.012               | 0.032               | 0.012               | 0.025               | 0.009               |
| 300           | 0.88            | 0.50                                       | 3.41                                                            | 1.47       | 4.14              | 0.013               | 0.033               | 0.015               | 0.031               | 0.009               |
| 360           | 0.92            | 0.50                                       | 3.85                                                            | 1.52       | 4.53              | 0.014               | 0.034               | 0.016               | 0.029               | 0.009               |
| 720           | 0.79            | 0.07                                       | 4.31                                                            | 1.68       | 4.91              | 0.016               | 0.036               | 0.018               | 0.035               | 0.007               |
| 1440          | 0.82            | 0.07                                       | 5.15                                                            | 1.88       | 5.80              | 0.018               | 0.040               | 0.021               | 0.044               | 0.009               |
| 2880          | 0.73            | 0.06                                       | 3.35                                                            | 2.02       | 3.76              | 0.012               | 0.027               | 0.022               | 0.057               | 0.008               |
| 4320          | 0.66            | 0.05                                       | 1.82                                                            | 1.49       | 2.19              | 0.007               | 0.018               | 0.016               | 0.037               | 0.007               |
| 5760          | 0.56            | 0.05                                       | 1.68                                                            | 1.76       | 1.99              | 0.007               | 0.016               | 0.018               | 0.052               | 0.005               |

**Table S13.** Time variation of **3**, [PdPy\*<sub>4</sub>](BF<sub>4</sub>)<sub>2</sub>, [Pd<sub>6</sub>**3**<sub>12</sub>](BF<sub>4</sub>)<sub>12</sub>, Py\*, and **Int**;  $\langle a \rangle$ – $\langle c \rangle$  values of the average composition of the intermediates ([Pd<sub>(a)</sub>**3**<sub>(b)</sub>Py\*<sub>(c)</sub>]<sup>2(a)+</sup>); ( $\langle n \rangle$ ,  $\langle k \rangle$ ) values for the self-assembly of [Pd<sub>6</sub>**3**<sub>12</sub>](BF<sub>4</sub>)<sub>12</sub> from **3** and [PdPy\*<sub>4</sub>](BF<sub>4</sub>)<sub>2</sub> in CD<sub>3</sub>NO<sub>2</sub> and CD<sub>2</sub>Cl<sub>2</sub> (4:1, v/v) at 298 K ([**3**]<sub>0</sub> = 2.3 mM). (run 7)

| Time / min | <b>3</b> / % | [PdPy* <sub>4</sub> ] <sup>2+</sup> / % | [Pd <sub>6</sub> <b>3</b> <sub>12</sub> ] <sup>12+</sup> / % | Py* / % | <b>Int</b> / % | $\langle a \rangle$ | $\langle b \rangle$ | $\langle c \rangle$ | $\langle n \rangle$ | $\langle k \rangle$ |
|------------|--------------|-----------------------------------------|--------------------------------------------------------------|---------|----------------|---------------------|---------------------|---------------------|---------------------|---------------------|
| 0          | 100.0        | 100.0                                   | 0.0                                                          | 0.0     | 0.0            | —                   | —                   | —                   | —                   | —                   |
| 5          | 40.3         | 16.2                                    | 1.4                                                          | 50.5    | 58.3           | 0.242               | 0.342               | 0.392               | 1.684               | 0.708               |
| 10         | 19.0         | 5.2                                     | 2.8                                                          | 74.0    | 78.3           | 0.270               | 0.460               | 0.244               | 1.819               | 0.588               |
| 15         | 12.3         | 4.0                                     | 3.8                                                          | 81.6    | 83.9           | 0.271               | 0.493               | 0.170               | 1.854               | 0.550               |
| 20         | 10.6         | 3.5                                     | 4.8                                                          | 87.9    | 84.5           | 0.269               | 0.497               | 0.101               | 1.965               | 0.542               |
| 25         | 8.2          | 3.0                                     | 5.4                                                          | 88.4    | 86.5           | 0.269               | 0.508               | 0.101               | 1.920               | 0.530               |
| 30         | 6.9          | 2.3                                     | 5.9                                                          | 90.0    | 87.3           | 0.270               | 0.513               | 0.090               | 1.929               | 0.526               |
| 35         | 6.3          | 3.1                                     | 6.3                                                          | 92.8    | 87.4           | 0.266               | 0.513               | 0.048               | 1.979               | 0.518               |
| 40         | 6.1          | 3.0                                     | 6.8                                                          | 92.5    | 87.1           | 0.265               | 0.511               | 0.052               | 1.969               | 0.518               |
| 45         | 6.1          | 3.0                                     | 7.1                                                          | 92.8    | 86.8           | 0.264               | 0.510               | 0.049               | 1.975               | 0.518               |
| 50         | 6.0          | 3.0                                     | 7.4                                                          | 94.1    | 86.6           | 0.263               | 0.508               | 0.034               | 2.002               | 0.517               |
| 55         | 6.0          | 3.0                                     | 8.1                                                          | 94.2    | 85.9           | 0.261               | 0.505               | 0.033               | 2.004               | 0.517               |
| 60         | 5.7          | 3.0                                     | 8.5                                                          | 94.6    | 85.8           | 0.260               | 0.504               | 0.028               | 2.007               | 0.516               |
| 120        | 4.8          | 3.0                                     | 11.7                                                         | 94.0    | 83.5           | 0.250               | 0.491               | 0.035               | 1.970               | 0.510               |
| 180        | 2.1          | 3.0                                     | 12.2                                                         | 94.4    | 85.7           | 0.249               | 0.503               | 0.030               | 1.918               | 0.495               |
| 240        | 2.1          | 3.0                                     | 15.1                                                         | 93.8    | 82.9           | 0.241               | 0.487               | 0.037               | 1.900               | 0.494               |
| 300        | 2.0          | 3.0                                     | 16.4                                                         | 93.8    | 81.6           | 0.237               | 0.479               | 0.037               | 1.896               | 0.493               |
| 360        | 1.9          | 3.0                                     | 17.9                                                         | 94.2    | 80.2           | 0.232               | 0.471               | 0.033               | 1.903               | 0.493               |
| 720        | 1.9          | 1.7                                     | 24.2                                                         | 95.9    | 73.9           | 0.218               | 0.434               | 0.029               | 1.939               | 0.501               |
| 1440       | 1.5          | 1.7                                     | 31.1                                                         | 98.7    | 67.5           | 0.197               | 0.396               | -0.005              | 2.006               | 0.498               |
| 2880       | 1.5          | 1.7                                     | 40.2                                                         | 97.9    | 58.3           | 0.171               | 0.342               | 0.005               | 1.980               | 0.499               |
| 4320       | 1.5          | 1.7                                     | 45.1                                                         | 98.3    | 53.4           | 0.156               | 0.314               | 0.000               | 1.991               | 0.498               |
| 5760       | 1.4          | 1.7                                     | 45.5                                                         | 98.0    | 53.1           | 0.155               | 0.312               | 0.004               | 1.976               | 0.497               |

**Table S14.** Time variation of **3**, [PdPy\*<sub>4</sub>](BF<sub>4</sub>)<sub>2</sub>, [Pd<sub>6</sub>**3**<sub>12</sub>](BF<sub>4</sub>)<sub>12</sub>, Py\*, and **Int**;  $\langle a \rangle$ – $\langle c \rangle$  values of the average composition of the intermediates ([Pd<sub>(a)</sub>**3**<sub>(b)</sub>Py\*<sub>(c)</sub>]<sup>2(a)+</sup>); ( $\langle n \rangle$ ,  $\langle k \rangle$ ) values for the self-assembly of [Pd<sub>6</sub>**3**<sub>12</sub>](BF<sub>4</sub>)<sub>12</sub> from **3** and [PdPy\*<sub>4</sub>](BF<sub>4</sub>)<sub>2</sub> in CD<sub>3</sub>NO<sub>2</sub> and CD<sub>2</sub>Cl<sub>2</sub> (4:1, v/v) at 298 K ([**3**]<sub>0</sub> = 2.2 mM). (run 8)

| Time<br>/ min | <b>3</b><br>/ % | [PdPy* <sub>4</sub> ] <sup>2+</sup><br>/ % | [Pd <sub>6</sub> <b>3</b> <sub>12</sub> ] <sup>12+</sup><br>/ % | Py*<br>/ % | <b>Int</b><br>/ % | $\langle a \rangle$ | $\langle b \rangle$ | $\langle c \rangle$ | $\langle n \rangle$ | $\langle k \rangle$ |
|---------------|-----------------|--------------------------------------------|-----------------------------------------------------------------|------------|-------------------|---------------------|---------------------|---------------------|---------------------|---------------------|
| 0             | 100.0           | 100.0                                      | 0.0                                                             | 0.0        | 0.0               | —                   | —                   | —                   | —                   | —                   |
| 5             | 33.0            | 12.5                                       | 1.5                                                             | 58.2       | 65.4              | 0.252               | 0.384               | 0.344               | 1.730               | 0.657               |
| 10            | 19.0            | 4.0                                        | 2.9                                                             | 76.9       | 78.1              | 0.273               | 0.459               | 0.224               | 1.895               | 0.596               |
| 15            | 11.7            | 3.5                                        | 4.0                                                             | 85.4       | 84.2              | 0.272               | 0.495               | 0.130               | 1.932               | 0.549               |
| 20            | 8.9             | 2.9                                        | 5.2                                                             | 89.4       | 85.8              | 0.270               | 0.504               | 0.091               | 1.960               | 0.535               |
| 25            | 5.0             | 2.1                                        | 6.0                                                             | 92.1       | 89.0              | 0.270               | 0.523               | 0.068               | 1.934               | 0.516               |
| 30            | 5.1             | 2.2                                        | 6.8                                                             | 95.2       | 88.1              | 0.267               | 0.518               | 0.031               | 2.006               | 0.517               |
| 35            | 4.3             | 1.2                                        | 7.4                                                             | 95.3       | 88.3              | 0.268               | 0.519               | 0.041               | 1.991               | 0.518               |
| 40            | 3.4             | 2.0                                        | 8.3                                                             | 95.5       | 88.2              | 0.263               | 0.518               | 0.030               | 1.976               | 0.508               |
| 45            | 3.4             | 2.2                                        | 8.7                                                             | 95.6       | 87.9              | 0.262               | 0.516               | 0.026               | 1.976               | 0.507               |
| 50            | 3.0             | 0.9                                        | 9.4                                                             | 95.7       | 87.6              | 0.264               | 0.515               | 0.040               | 1.970               | 0.512               |
| 55            | 2.9             | 2.2                                        | 9.5                                                             | 96.7       | 87.6              | 0.260               | 0.515               | 0.014               | 1.991               | 0.504               |
| 60            | 2.8             | 2.2                                        | 10.8                                                            | 96.2       | 86.5              | 0.256               | 0.508               | 0.019               | 1.976               | 0.503               |
| 120           | 2.7             | 2.2                                        | 13.3                                                            | 97.4       | 84.0              | 0.248               | 0.494               | 0.006               | 2.001               | 0.503               |
| 180           | 2.6             | 1.4                                        | 17.2                                                            | 97.2       | 80.2              | 0.239               | 0.471               | 0.017               | 1.995               | 0.508               |
| 240           | 2.5             | 1.5                                        | 21.0                                                            | 97.1       | 76.5              | 0.228               | 0.450               | 0.017               | 1.987               | 0.507               |
| 300           | 2.4             | 1.5                                        | 24.9                                                            | 97.5       | 72.7              | 0.216               | 0.427               | 0.012               | 1.999               | 0.507               |
| 360           | 2.2             | 1.5                                        | 28.4                                                            | 97.6       | 69.4              | 0.206               | 0.408               | 0.010               | 1.995               | 0.505               |
| 720           | 1.9             | 1.5                                        | 34.7                                                            | 98.6       | 63.4              | 0.188               | 0.372               | -0.001              | 2.018               | 0.504               |
| 1440          | 1.7             | 1.5                                        | 43.4                                                            | 97.8       | 54.9              | 0.162               | 0.323               | 0.008               | 1.983               | 0.502               |
| 2880          | 1.7             | 1.5                                        | 50.6                                                            | 98.1       | 47.7              | 0.141               | 0.280               | 0.004               | 1.992               | 0.502               |
| 4320          | 1.8             | 1.7                                        | 51.1                                                            | 96.7       | 47.1              | 0.139               | 0.277               | 0.019               | 1.936               | 0.501               |
| 5760          | 1.7             | 1.7                                        | 51.1                                                            | 97.5       | 47.2              | 0.139               | 0.277               | 0.009               | 1.970               | 0.500               |

**Table S15.** Time variation of **3**, [PdPy\*<sub>4</sub>](BF<sub>4</sub>)<sub>2</sub>, [Pd<sub>6</sub>**3**<sub>12</sub>](BF<sub>4</sub>)<sub>12</sub>, Py\*, and **Int**;  $\langle a \rangle$ – $\langle c \rangle$  values of the average composition of the intermediates ([Pd<sub>(a)</sub>**3**<sub>(b)</sub>Py\*<sub>(c)</sub>]<sup>2(a)+</sup>); ( $\langle n \rangle$ ,  $\langle k \rangle$ ) values for the self-assembly of [Pd<sub>6</sub>**3**<sub>12</sub>](BF<sub>4</sub>)<sub>12</sub> from **3** and [PdPy\*<sub>4</sub>](BF<sub>4</sub>)<sub>2</sub> in CD<sub>3</sub>NO<sub>2</sub> and CD<sub>2</sub>Cl<sub>2</sub> (4:1, v/v) at 298 K ([**3**]<sub>0</sub> = 2.1 mM). (run 9)

| Time<br>/ min | <b>3</b><br>/ % | [PdPy* <sub>4</sub> ] <sup>2+</sup><br>/ % | [Pd <sub>6</sub> <b>3</b> <sub>12</sub> ] <sup>12+</sup><br>/ % | Py*<br>/ % | <b>Int</b><br>/ % | $\langle a \rangle$ | $\langle b \rangle$ | $\langle c \rangle$ | $\langle n \rangle$ | $\langle k \rangle$ |
|---------------|-----------------|--------------------------------------------|-----------------------------------------------------------------|------------|-------------------|---------------------|---------------------|---------------------|---------------------|---------------------|
| 0             | 100.0           | 100.0                                      | 0.0                                                             | 0.0        | 0.0               | —                   | —                   | —                   | —                   | —                   |
| 5             | 42.2            | 13.6                                       | 1.4                                                             | 43.3       | 56.4              | 0.231               | 0.306               | 0.468               | 1.487               | 0.753               |
| 10            | 20.0            | 3.7                                        | 2.7                                                             | 65.8       | 77.3              | 0.254               | 0.419               | 0.332               | 1.632               | 0.606               |
| 15            | 13.7            | 2.1                                        | 4.2                                                             | 74.5       | 82.0              | 0.254               | 0.445               | 0.253               | 1.714               | 0.571               |
| 20            | 11.5            | 2.4                                        | 5.3                                                             | 80.9       | 83.2              | 0.250               | 0.451               | 0.181               | 1.819               | 0.555               |
| 25            | 9.6             | 2.4                                        | 6.5                                                             | 83.6       | 83.9              | 0.247               | 0.455               | 0.152               | 1.838               | 0.543               |
| 30            | 9.2             | 2.4                                        | 7.1                                                             | 86.1       | 83.7              | 0.246               | 0.454               | 0.126               | 1.886               | 0.541               |
| 35            | 8.6             | 1.3                                        | 8.3                                                             | 87.1       | 83.1              | 0.245               | 0.451               | 0.126               | 1.897               | 0.544               |
| 40            | 7.4             | 2.2                                        | 8.9                                                             | 87.6       | 83.7              | 0.241               | 0.454               | 0.111               | 1.881               | 0.531               |
| 45            | 7.4             | 2.4                                        | 9.3                                                             | 87.5       | 83.2              | 0.240               | 0.452               | 0.110               | 1.877               | 0.530               |
| 50            | 7.0             | 1.0                                        | 10.2                                                            | 88.0       | 82.8              | 0.241               | 0.449               | 0.119               | 1.879               | 0.536               |
| 55            | 6.8             | 2.4                                        | 11.0                                                            | 89.3       | 82.3              | 0.235               | 0.446               | 0.091               | 1.905               | 0.527               |
| 60            | 6.8             | 2.4                                        | 11.7                                                            | 89.9       | 81.6              | 0.233               | 0.442               | 0.084               | 1.919               | 0.527               |
| 120           | 5.6             | 2.4                                        | 17.3                                                            | 90.5       | 77.0              | 0.218               | 0.418               | 0.078               | 1.899               | 0.521               |
| 180           | 5.5             | 1.5                                        | 21.6                                                            | 91.2       | 73.0              | 0.209               | 0.396               | 0.079               | 1.909               | 0.527               |
| 240           | 5.3             | 1.6                                        | 24.9                                                            | 93.0       | 69.9              | 0.199               | 0.379               | 0.058               | 1.951               | 0.526               |
| 300           | 4.8             | 1.6                                        | 27.8                                                            | 92.7       | 67.4              | 0.192               | 0.366               | 0.062               | 1.926               | 0.524               |
| 360           | 4.8             | 1.6                                        | 30.3                                                            | 92.5       | 64.9              | 0.185               | 0.352               | 0.064               | 1.917               | 0.525               |
| 720           | 4.3             | 1.6                                        | 38.6                                                            | 92.8       | 57.1              | 0.162               | 0.310               | 0.061               | 1.898               | 0.524               |
| 1440          | 4.0             | 1.6                                        | 48.4                                                            | 92.7       | 47.6              | 0.136               | 0.258               | 0.062               | 1.863               | 0.526               |
| 2880          | 3.8             | 1.6                                        | 49.8                                                            | 92.0       | 46.5              | 0.132               | 0.252               | 0.070               | 1.816               | 0.523               |
| 4320          | 3.6             | 1.8                                        | 49.8                                                            | 93.2       | 46.6              | 0.131               | 0.253               | 0.053               | 1.864               | 0.519               |
| 5760          | 3.2             | 1.8                                        | 49.8                                                            | 92.5       | 47.0              | 0.131               | 0.255               | 0.061               | 1.818               | 0.515               |

## Monitoring of the self-assembly of the $[\text{Pd}_6\text{L}_{12}](\text{BF}_4)_{12}$ complexes by ESI-TOF mass spectrometry

A solution of  $[\text{PdPy}^*_4](\text{BF}_4)_2$  and L (**1<sup>S</sup>**, **2**, or **3**) were mixed in a 1:2 ratio in  $\text{CD}_3\text{NO}_2$  for **1<sup>S</sup>** ( $[\text{1}^{\text{S}}]_0 = 1.8 \text{ mM}$ ) or a mixed solvent of  $\text{CD}_3\text{NO}_2$  and  $\text{CD}_2\text{Cl}_2$  (4/1, v/v) for **2** and **3** ( $[\text{2}]_0 = 1.9 \text{ mM}$  and  $[\text{3}]_0 = 2.0 \text{ mM}$ ). At each time point, 50  $\mu\text{L}$  of the reaction mixture was taken, diluted with  $\text{CH}_3\text{NO}_2$  (500  $\mu\text{L}$ ), filtered through a membrane filter (pore size: 0.20  $\mu\text{m}$ ) and injected in the mass spectrometer with 5.0  $\mu\text{L}/\text{min}$  flow rate to obtain ESI-TOF mass spectra (Figures S4, S5, and S6 for  $[\text{Pd}_6\text{1}^{\text{S}}]_{12}(\text{BF}_4)_{12}$ ,  $[\text{Pd}_6\text{2}]_{12}(\text{BF}_4)_{12}$ , and  $[\text{Pd}_6\text{3}]_{12}(\text{BF}_4)_{12}$ , respectively).



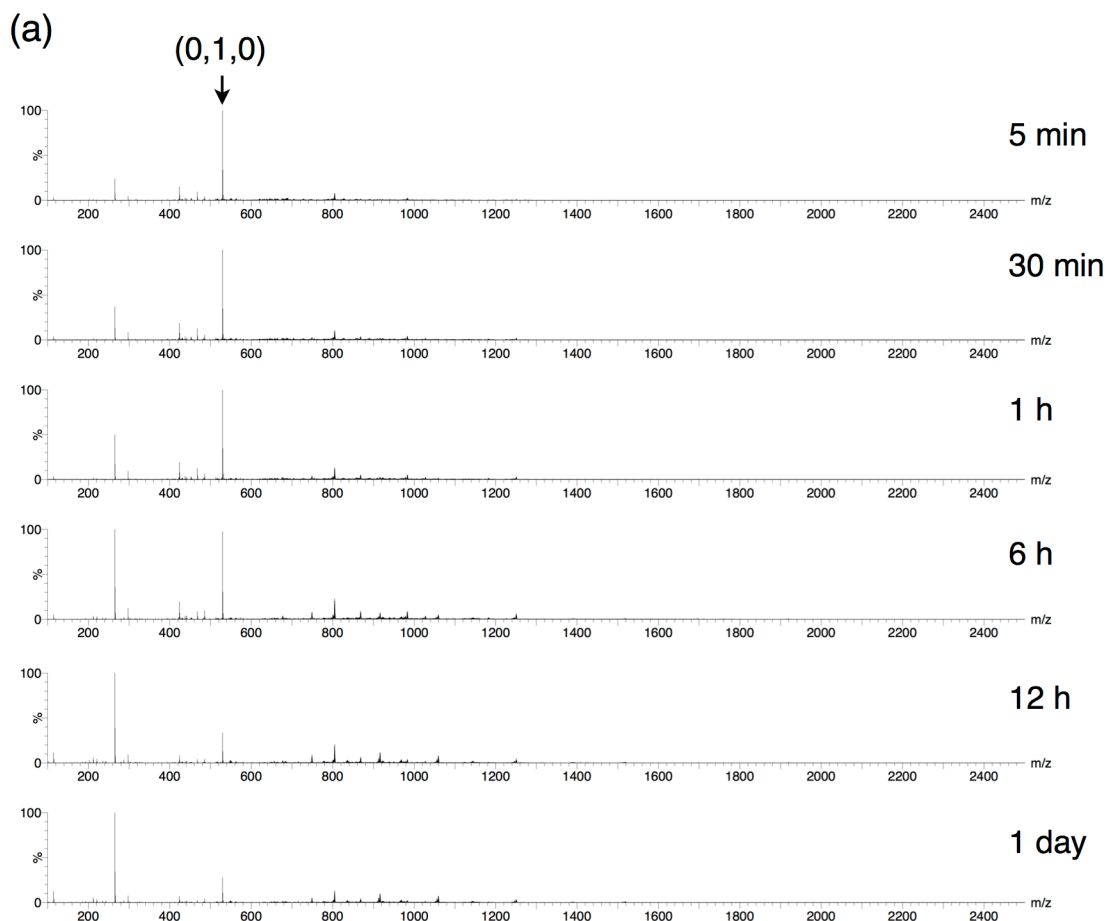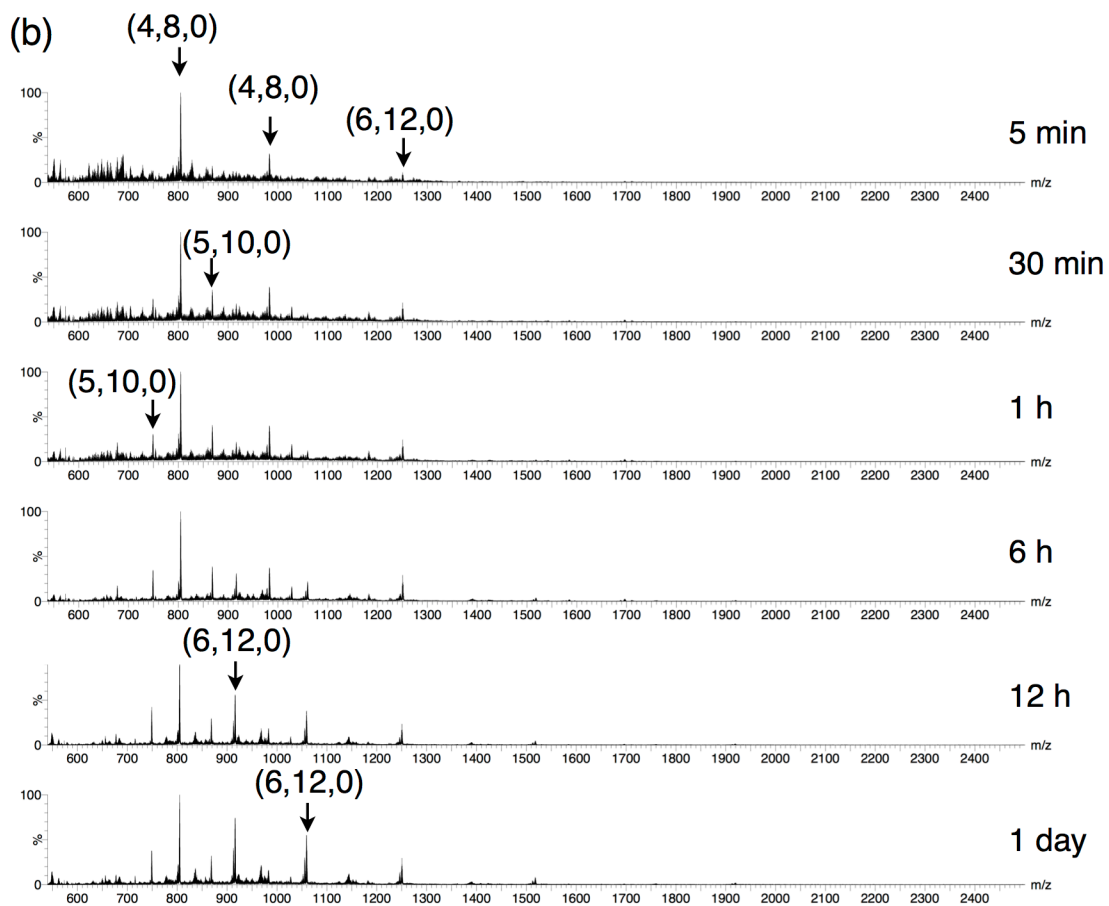

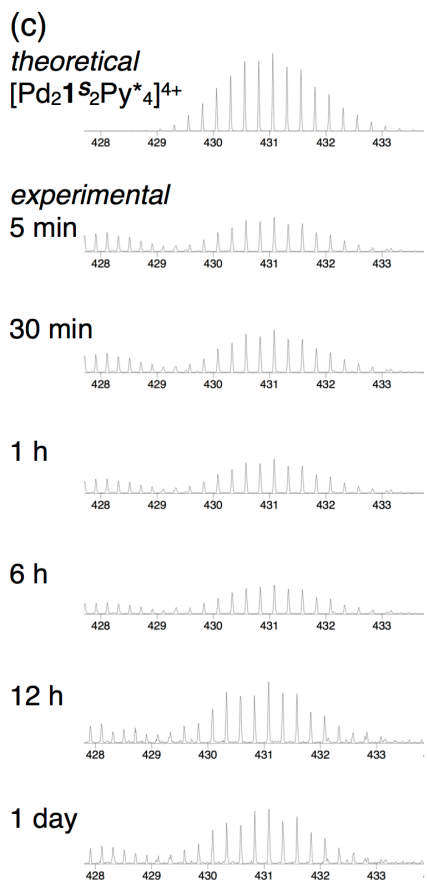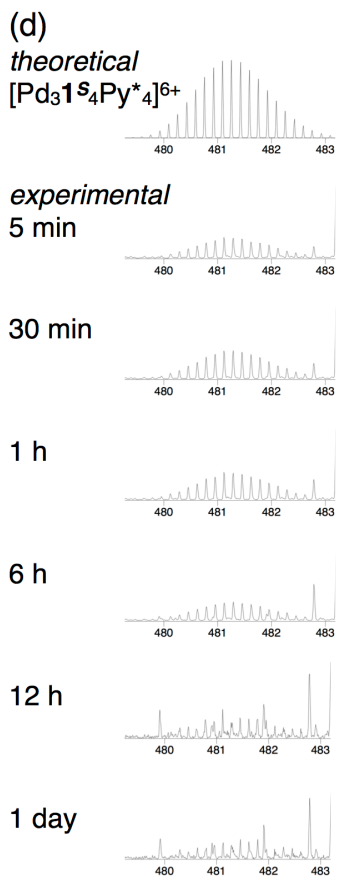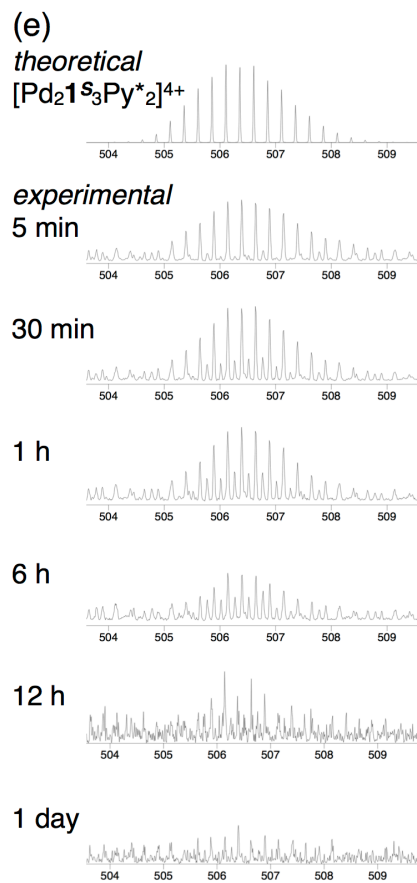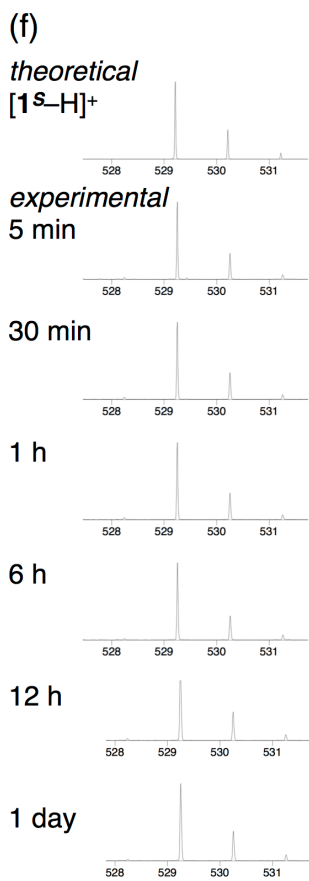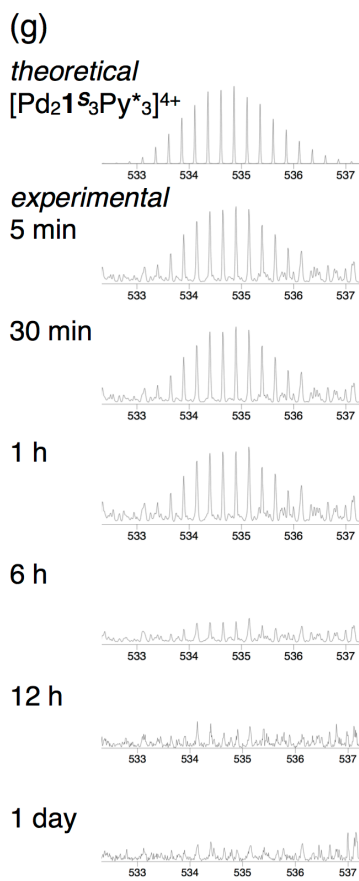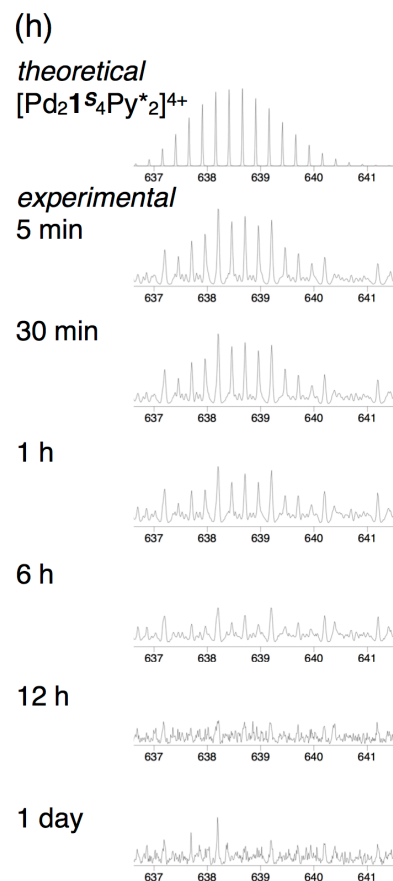

(i)

*theoretical*  
 $[\text{Pd}_4\text{1S}_7\text{Py}^*_2(\text{BF}_4)_2]^{6+}$

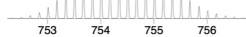

*experimental*  
5 min

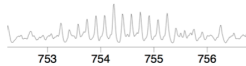

30 min

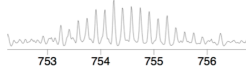

1 h

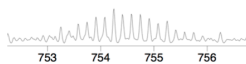

6 h

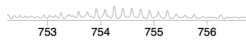

12 h

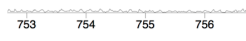

1 day

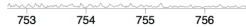

(j)

*theoretical*  
 $[\text{Pd}_3\text{1S}_6\text{Py}^*_2(\text{BF}_4)]^{5+}$

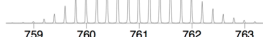

*experimental*  
5 min

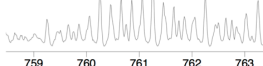

30 min

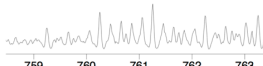

1 h

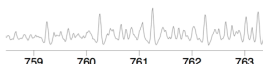

6 h

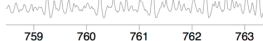

12 h

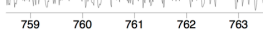

1 day

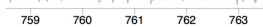

(k)

*theoretical*  
 $[\text{Pd}_5\text{1S}_{10}(\text{BF}_4)_3]^{7+}$

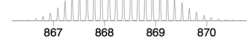

*experimental*  
5 min

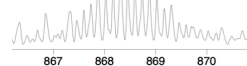

30 min

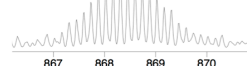

1 h

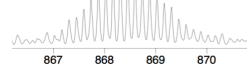

6 h

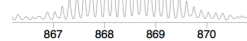

12 h

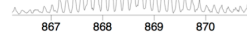

1 day

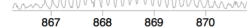

(l)

*theoretical*

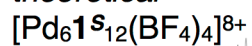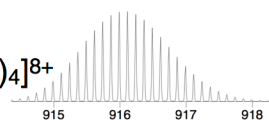

*experimental*

5 min

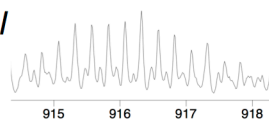

30 min

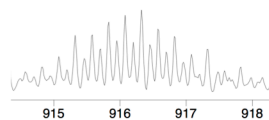

1 h

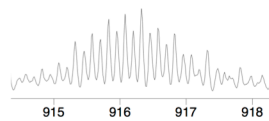

6 h

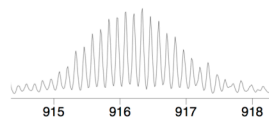

12 h

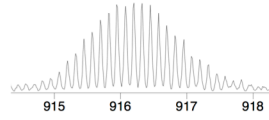

1 day

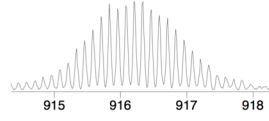

(m)

*theoretical*

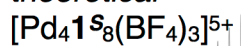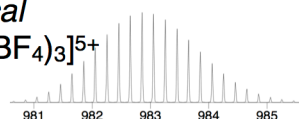

*experimental*

5 min

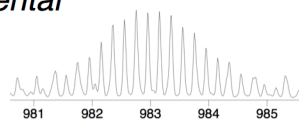

30 min

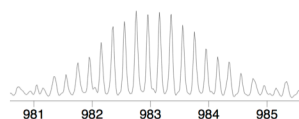

1 h

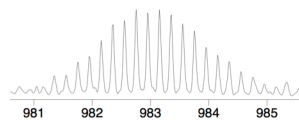

6 h

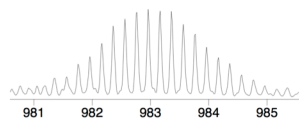

12 h

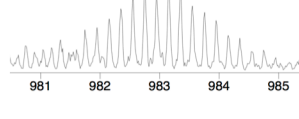

1 day

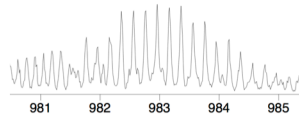

(n)

*theoretical*

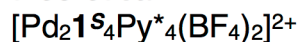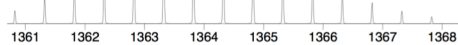

*experimental*

5 min

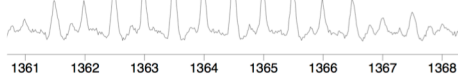

30 min

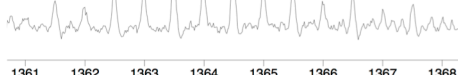

1 h

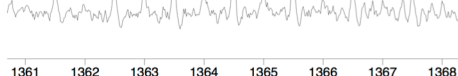

6 h

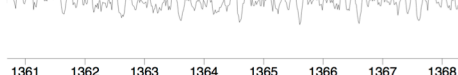

12 h

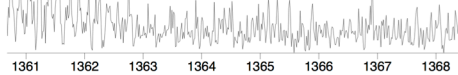

1 day

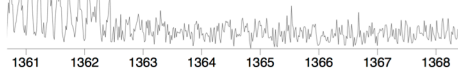

**Figure S4.** ESI-TOF mass spectra of the reaction mixture for the self-assembly of  $[\text{Pd}_6\mathbf{1}^{\text{S}}_{12}](\text{BF}_4)_{12}$  from  $\mathbf{1}^{\text{S}}$  and  $[\text{PdPy}^*_4](\text{BF}_4)_2$  in  $\text{CD}_3\text{NO}_2$  at 298 K ( $[\mathbf{1}^{\text{S}}]_0 = 1.8 \text{ mM}$ ), measured at 5 min, 30 min, 1 h, 6 h, 12 h, and 1 day. Measurement condition: Capillary / 1.5 kV; Sampling Cone / 30 V; Source Offset / 80 V; Source / 80 °C; Desolvation / 150 °C; Cone Gas / 50 L h<sup>-1</sup>; Desolvation Gas / 800 L h<sup>-1</sup>. (a)  $m/z$ : 100–2500, (b)  $m/z$ : 550–2500, (c)  $[\text{Pd}_2\mathbf{1}^{\text{S}}_2\text{Py}^*_4]^{4+}$ , (d)  $[\text{Pd}_3\mathbf{1}^{\text{S}}_4\text{Py}^*_4]^{6+}$ , (e)  $[\text{Pd}_2\mathbf{1}^{\text{S}}_3\text{Py}^*_2]^{4+}$ , (f)  $[\mathbf{1}^{\text{S}}-\text{H}]^+$ , (g)  $[\text{Pd}_2\mathbf{1}^{\text{S}}_3\text{Py}^*_3]^{4+}$ , (h)  $[\text{Pd}_2\mathbf{1}^{\text{S}}_4\text{Py}^*_2]^{4+}$ , (i)  $[\text{Pd}_4\mathbf{1}^{\text{S}}_7\text{Py}^*_2(\text{BF}_4)_2]^{6+}$ , (j)  $[\text{Pd}_3\mathbf{1}^{\text{S}}_6\text{Py}^*_2(\text{BF}_4)]^{5+}$ , (k)  $[\text{Pd}_5\mathbf{1}^{\text{S}}_{10}(\text{BF}_4)_3]^{7+}$ , (l)  $[\text{Pd}_6\mathbf{1}^{\text{S}}_{12}(\text{BF}_4)_4]^{8+}$ , (m)  $[\text{Pd}_4\mathbf{1}^{\text{S}}_8(\text{BF}_4)_3]^{5+}$ , (n)  $[\text{Pd}_2\mathbf{1}^{\text{S}}_4\text{Py}^*_4(\text{BF}_4)_2]^{2+}$ . (a, b, c) indicates species  $[\text{Pd}_a\mathbf{1}^{\text{S}}_b\text{Py}^*_c]^{2a+}$ .

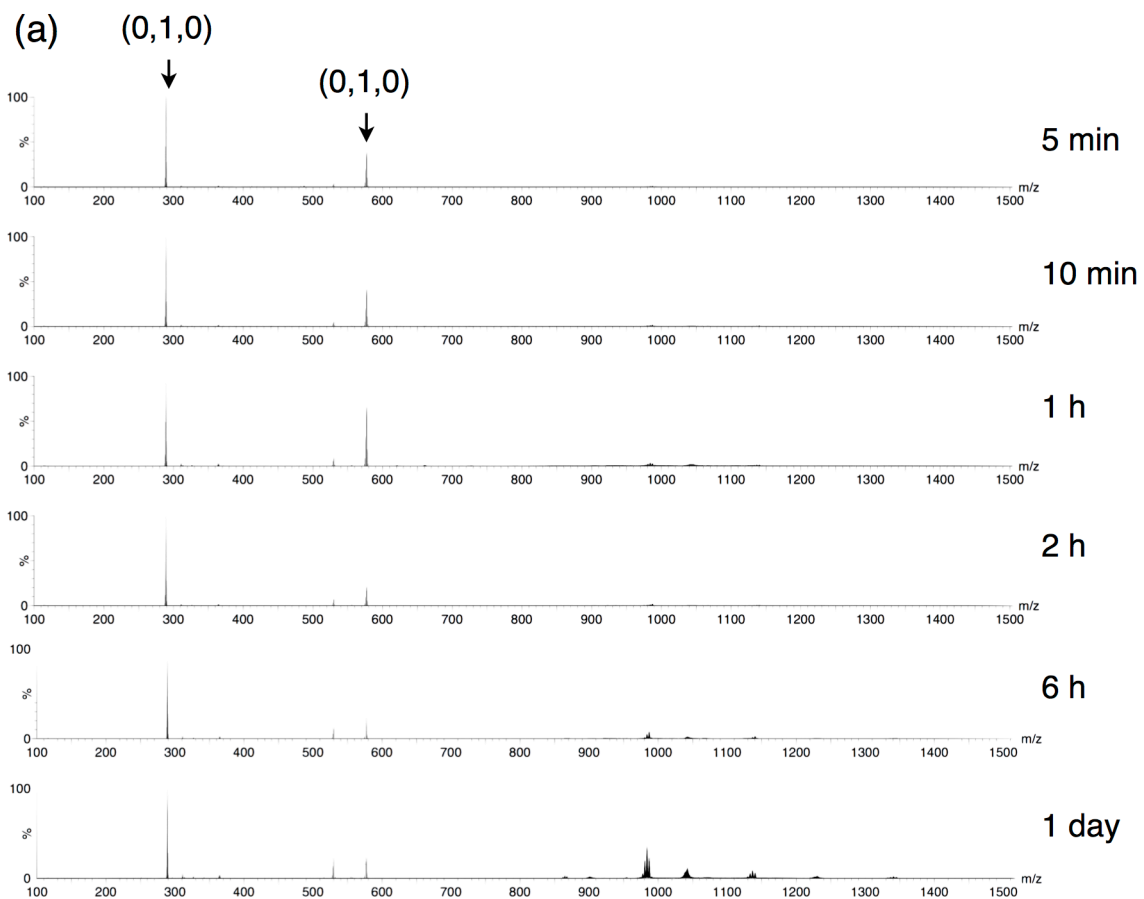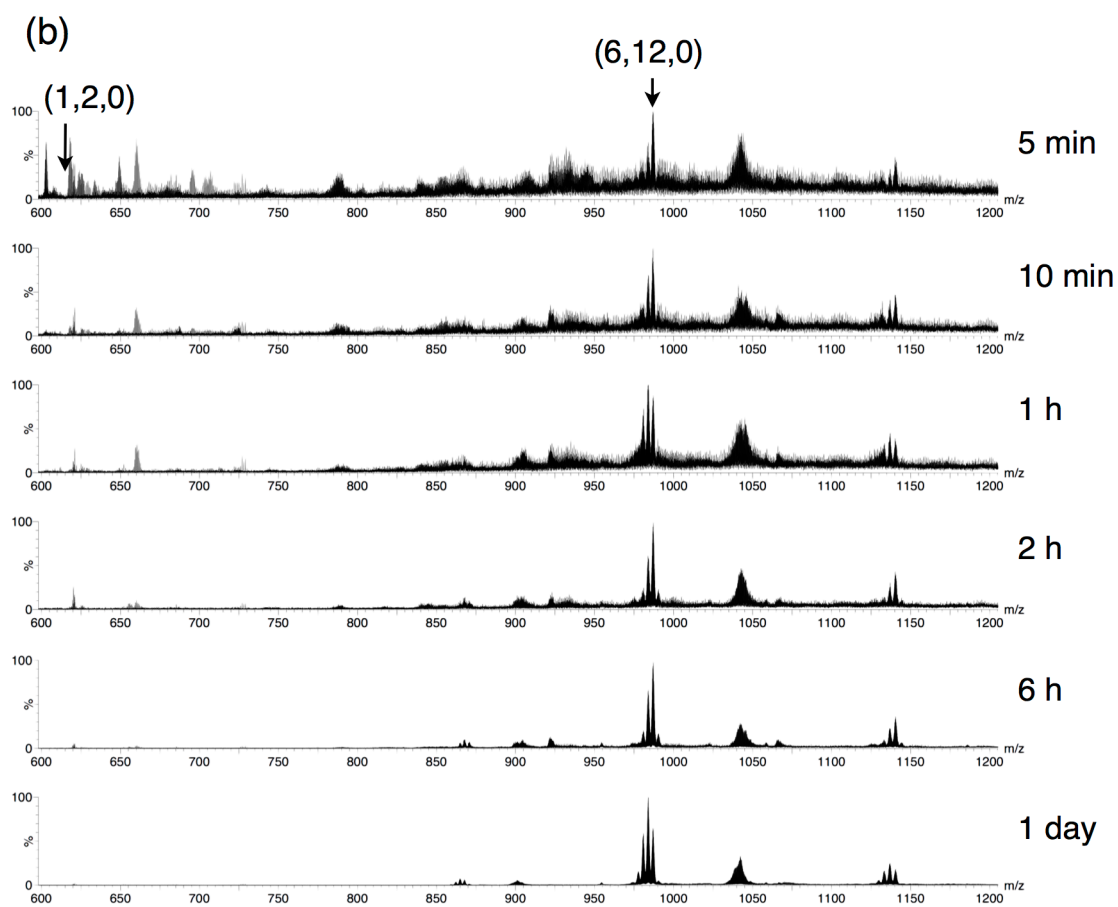

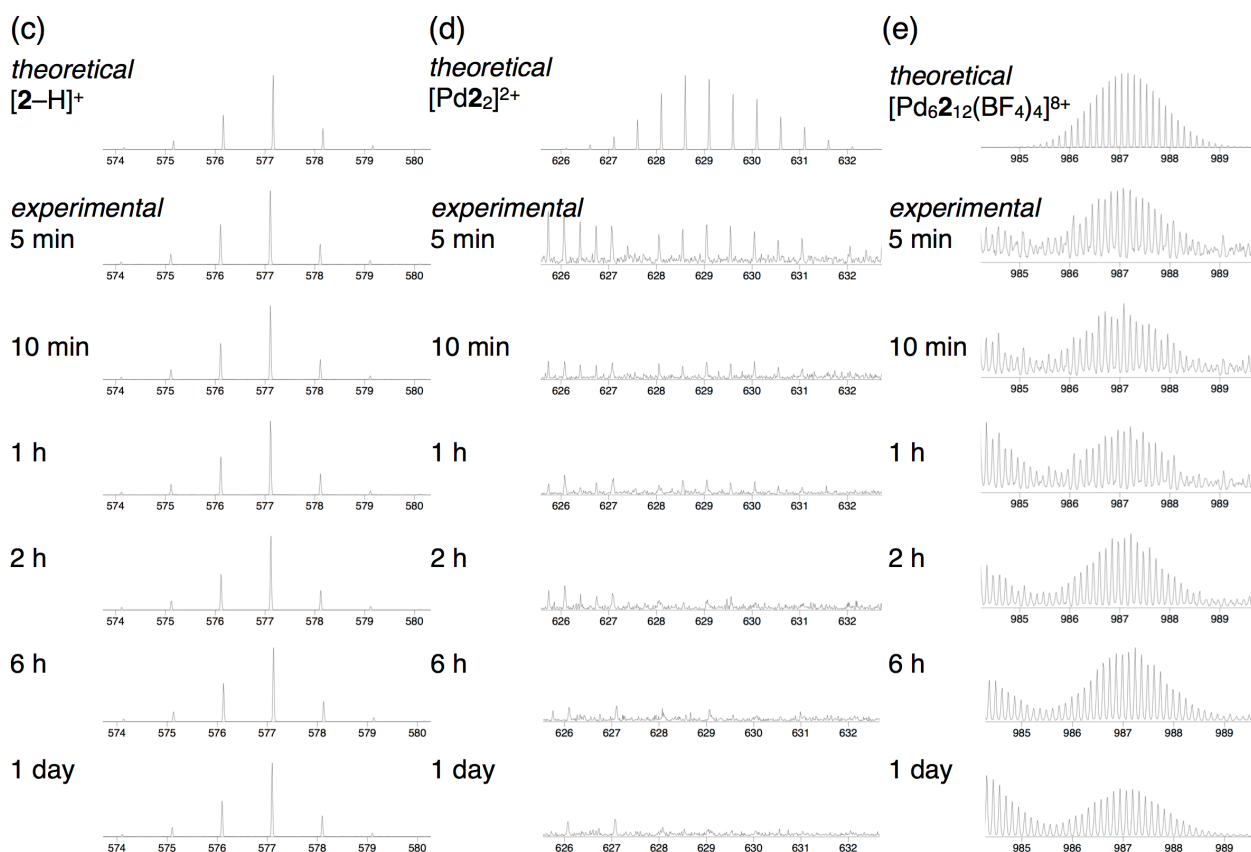

**Figure S5.** ESI-TOF mass spectra of the reaction mixture for the self-assembly of  $[\text{Pd}_6\mathbf{2}_{12}](\text{BF}_4)_{12}$  from **2** and  $[\text{PdPy}^*_4](\text{BF}_4)_2$  in  $\text{CD}_3\text{NO}_2$  and  $\text{CD}_2\text{Cl}_2$  (4:1, v/v) at 298 K ( $[\mathbf{2}]_0 = 1.9$  mM), measured at 5 min, 10 min, 1 h, 2 h, 6 h, and 1 day. Measurement condition: Capillary / 1.5 kV; Sampling Cone / 30 V; Source Offset / 80 V; Source / 80 °C; Desolvation / 150 °C; Cone Gas / 50 L h<sup>-1</sup>; Desolvation Gas / 800 L h<sup>-1</sup>. (a)  $m/z$ : 100–1500, (b)  $m/z$ : 600–1200, (c)  $[\mathbf{2}-\text{H}]^+$ , (d)  $[\text{Pd}_2\mathbf{2}]^{2+}$ , and (e)  $[\text{Pd}_6\mathbf{2}_{12}(\text{BF}_4)_4]^{8+}$ . (a, b, c) indicates species  $[\text{Pd}_a\mathbf{2}_b\text{Py}^*_c]^{2a+}$ .

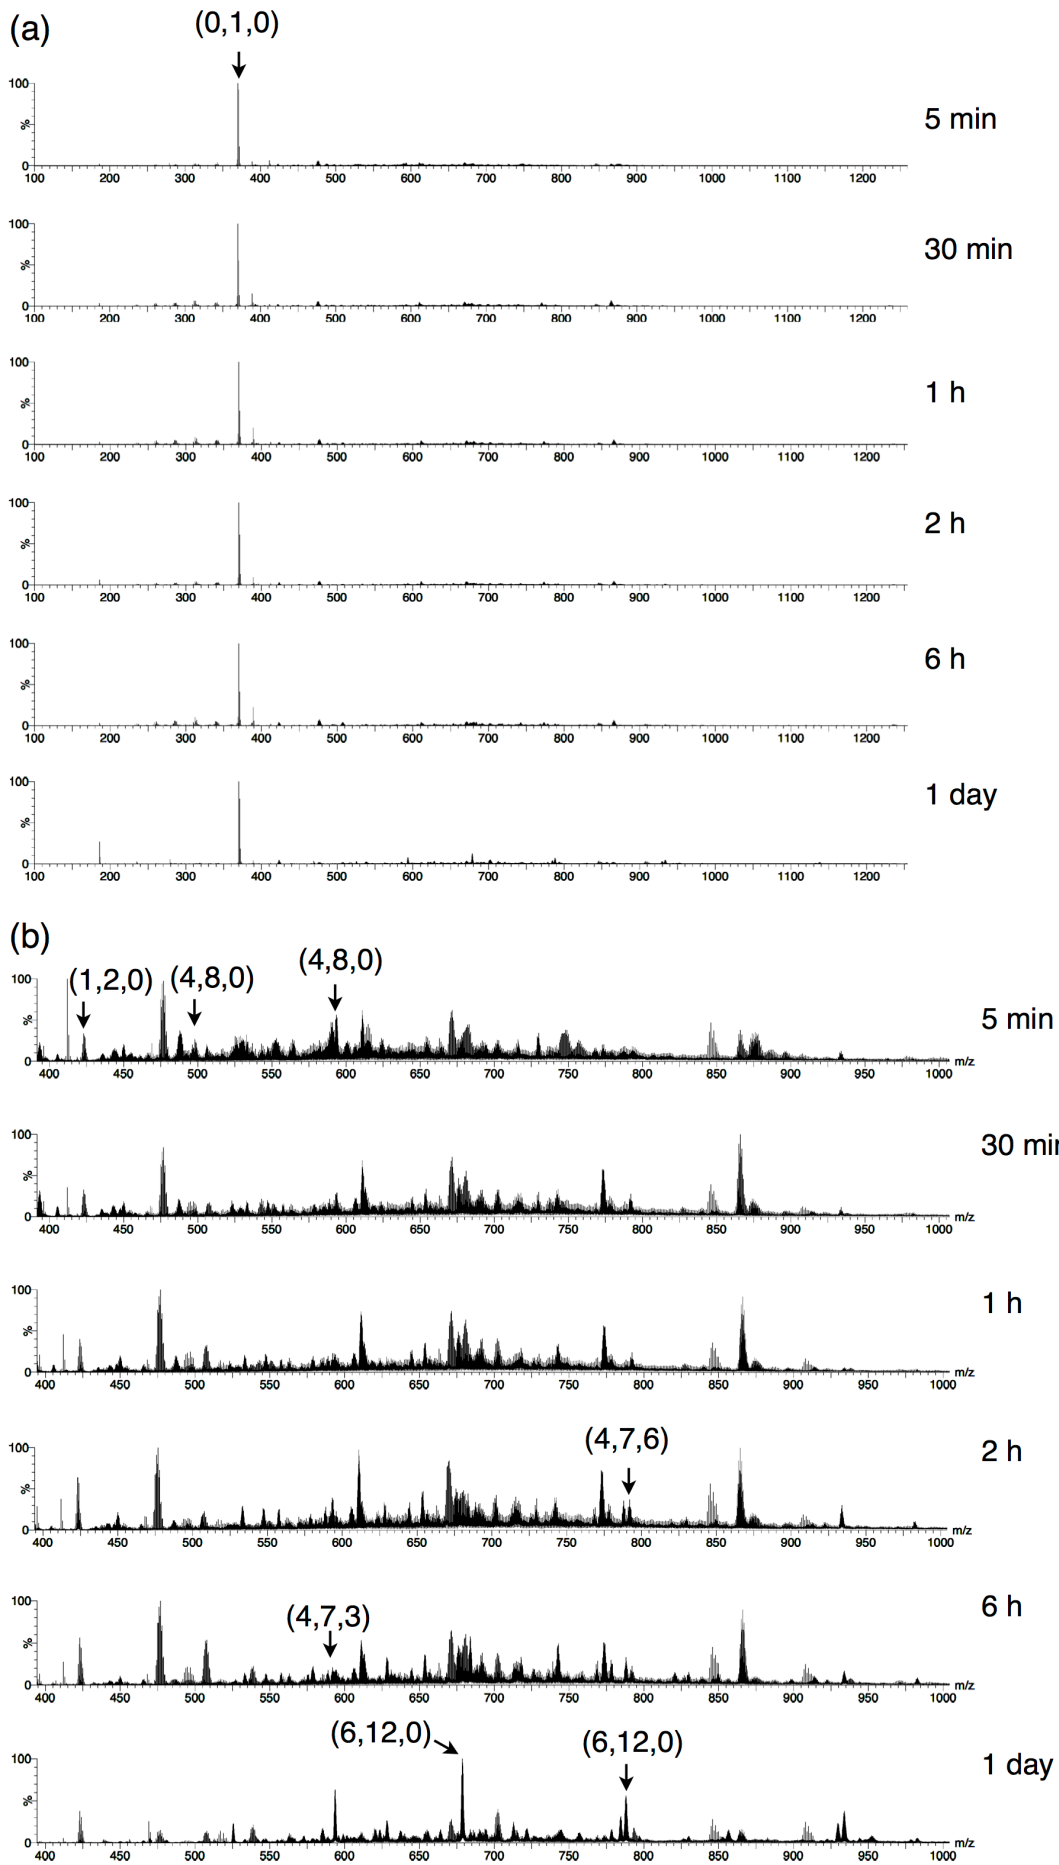



(c)

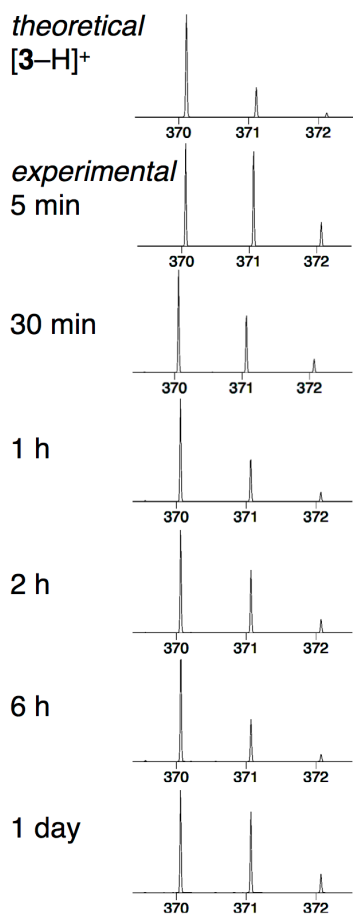

(d)

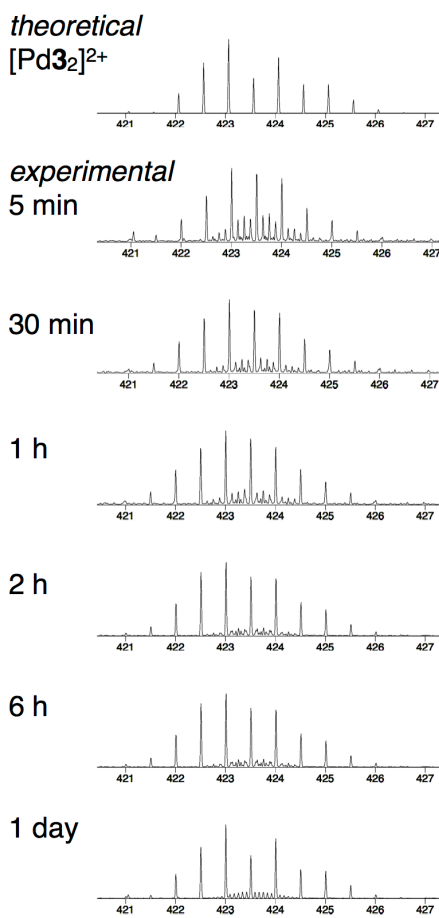

(e)

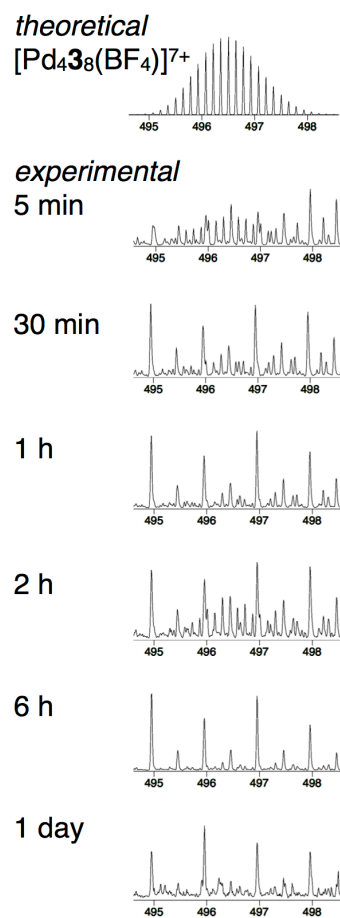

(f)

*theoretical*  
 $[\text{Pd}_4\mathbf{3}_8(\text{BF}_4)_2]^{6+}$

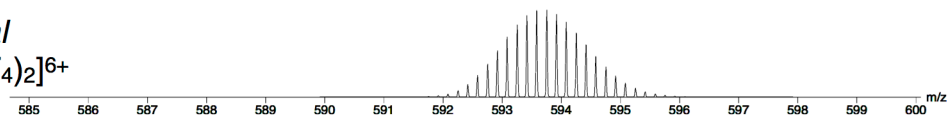

*theoretical*  
 $[\text{Pd}_4\mathbf{3}_7\text{Py}^*_3(\text{BF}_4)_2]^{6+}$

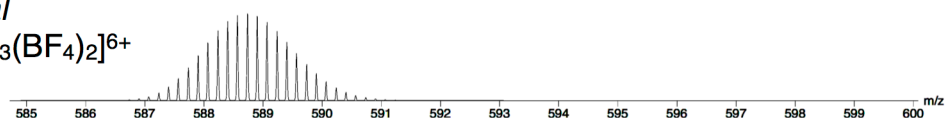

*experimental*  
5 min

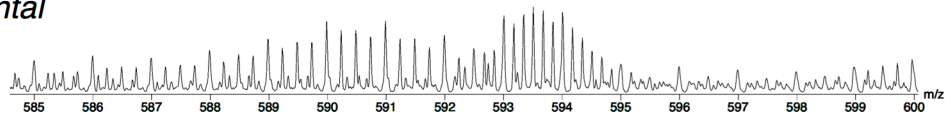

30 min

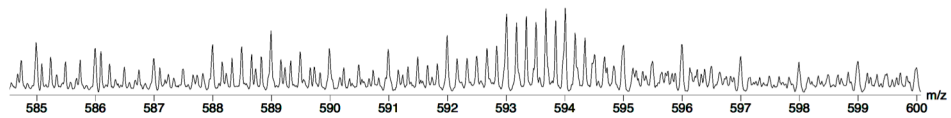

1 h

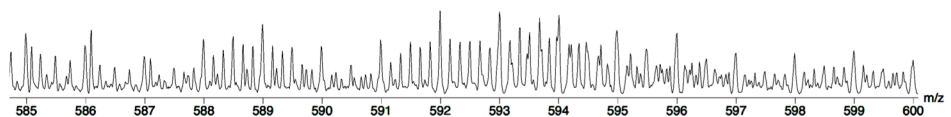

2 h

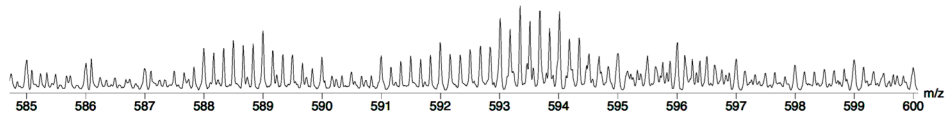

6 h

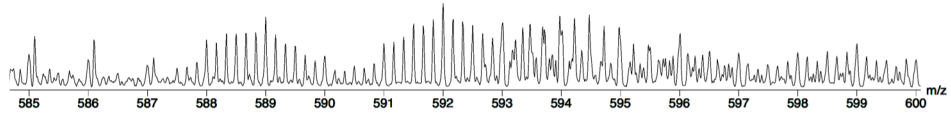

1 day

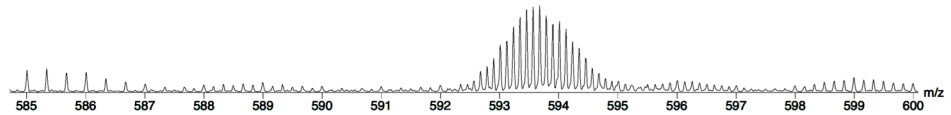

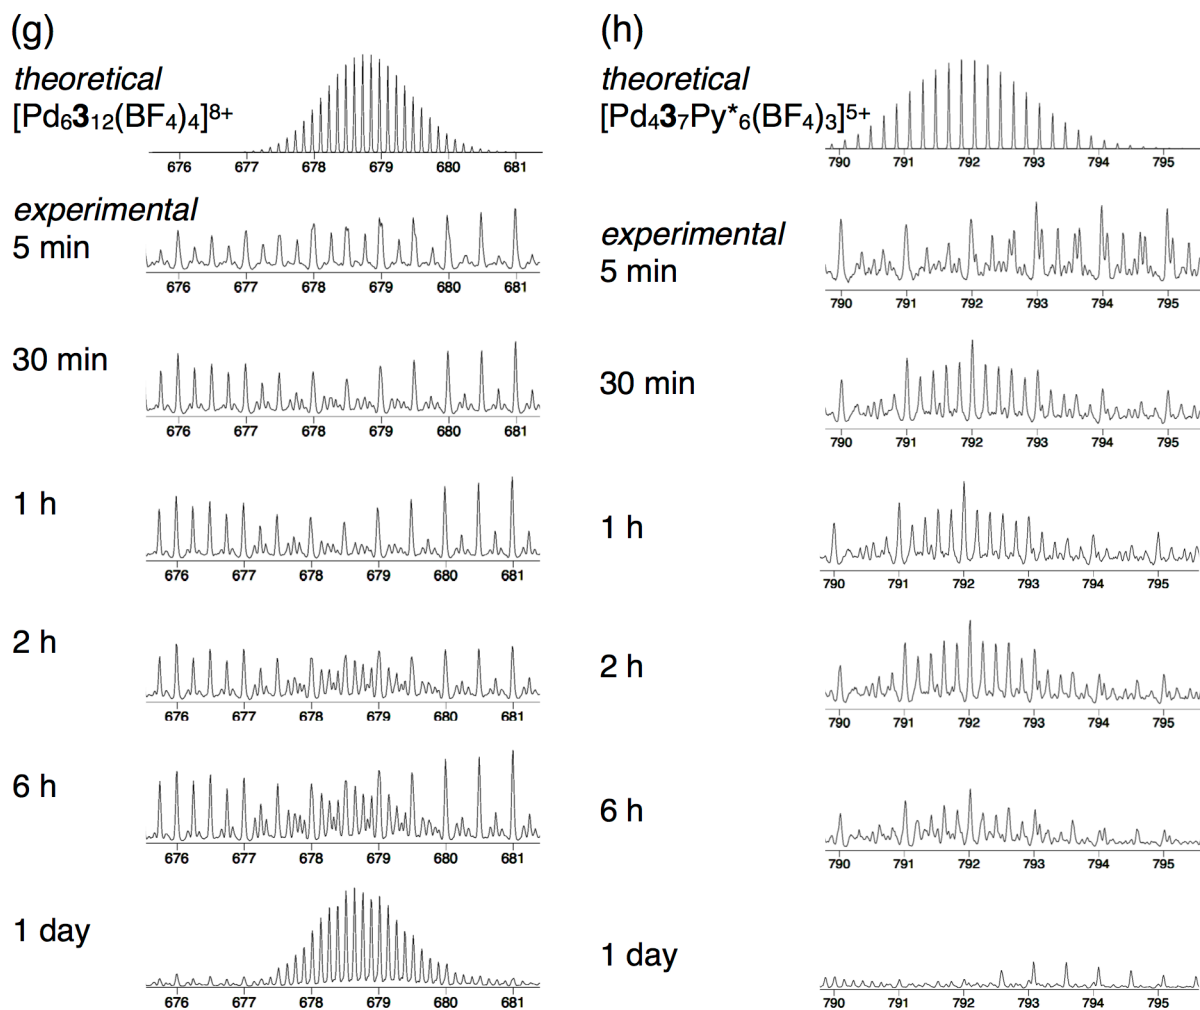

**Figure S6.** ESI-TOF mass spectra of the reaction mixture for the self-assembly of  $[\text{Pd}_6\mathbf{3}_{12}](\text{BF}_4)_{12}$  from **3** and  $[\text{PdPy}^*_4](\text{BF}_4)_2$  in  $\text{CD}_3\text{NO}_2$  and  $\text{CD}_2\text{Cl}_2$  (4:1, v/v) at 298 K ( $[\mathbf{3}]_0 = 2.0$  mM), measured at 5 min, 30 min, 1 h, 2 h, 6 h, and 1 day. Measurement condition: Capillary / 3.0 kV; Sampling Cone / 30 V; Source Offset / 80 V; Source / 80 °C; Desolvation / 150 °C; Cone Gas / 50 L h<sup>-1</sup>; Desolvation Gas / 800 L h<sup>-1</sup>. (a)  $m/z$ : 100–1300, (b)  $m/z$ : 400–1000, (c)  $[\mathbf{3}-\text{H}]^+$ , (d)  $[\text{Pd}\mathbf{3}_2]^{2+}$ , (e)  $[\text{Pd}_4\mathbf{3}_8(\text{BF}_4)]^{7+}$ , (f)  $[\text{Pd}_4\mathbf{3}_8(\text{BF}_4)_2]^{6+}$  and  $[\text{Pd}_4\mathbf{3}_7\text{Py}^*_3(\text{BF}_4)_2]^{6+}$ , (g)  $[\text{Pd}_6\mathbf{3}_{12}(\text{BF}_4)_4]^{8+}$ , and (h)  $[\text{Pd}_4\mathbf{3}_7\text{Py}^*_6(\text{BF}_4)_3]^{5+}$ . (a, b, c) indicates species  $[\text{Pd}_a\mathbf{3}_b\text{Py}^*_c]^{2a+}$ .

## Molecular modeling study

Geometry optimization was performed by molecular mechanics (*MM*) calculation with Universal Force field (BIOVIA Material Studio 2017 R2, Accelrys Software Inc.).

Optimized structures of double-walled motifs  $cis$ -[Pd<sub>2</sub>L<sub>2</sub>Py<sub>4</sub>]<sup>4+</sup> (Py: pyridine) for ditopic ligands **2** and **3**

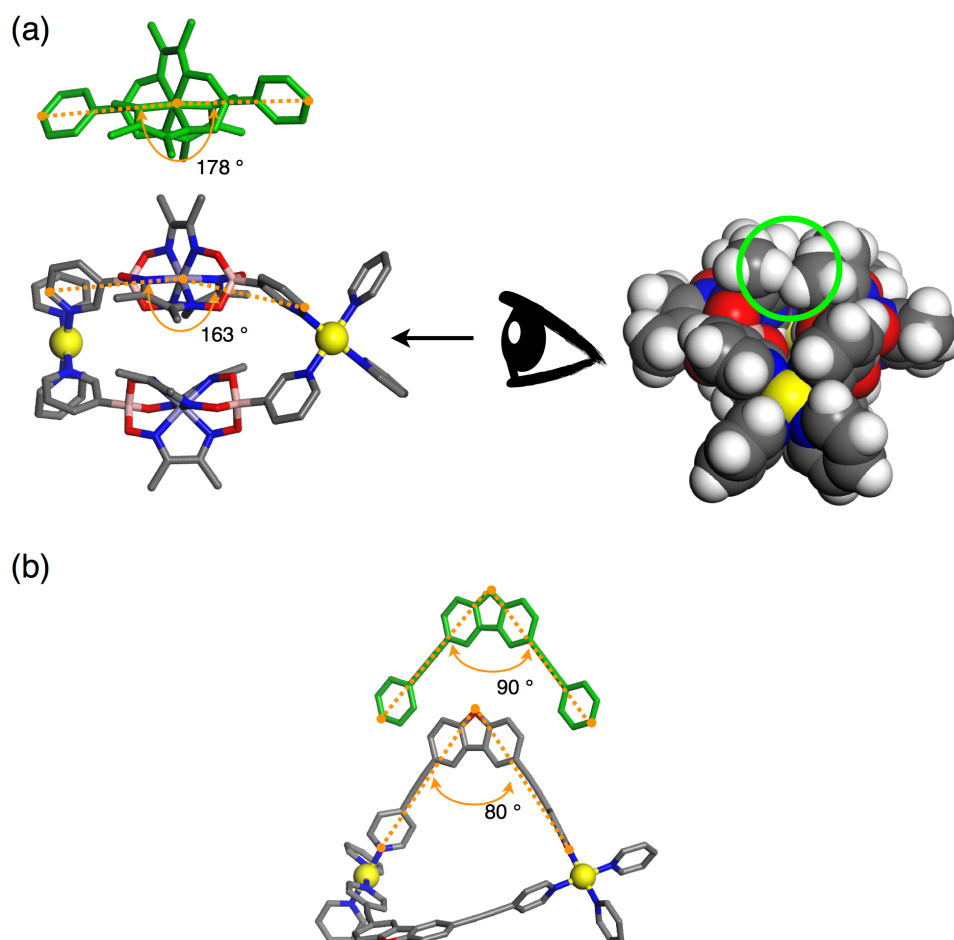

**Figure S7.** Optimized structures by *MM* calculation. Color labels: yellow, Pd; grey, C; blue, N; red, O; pink, B and purple, Fe. (a)  $cis$ -[Pd<sub>2</sub>2<sub>2</sub>Py<sub>4</sub>]<sup>4+</sup>. A stick model in green indicates optimized structure of **2**. A CPK model shown in the right is a side view of a ball-and-stick model. A green circle indicates the steric repulsion between methyl groups. (b)  $cis$ -[Pd<sub>2</sub>3<sub>2</sub>Py<sub>4</sub>]<sup>4+</sup>. A stick model in green indicates optimized structure of **3**.

## References

- (1) Gütz, C.; Hovorka, R.; Klein, C.; Jiang, Q. Q.; Bannwarth, C.; Engeser, M.; Schmuck, C.; Assenmacher, W.; Mader, W.; Topić, F.; Rissanen, K.; Grimme, S.; Lützen, A. *Angew. Chem. Int. Ed.* **2014**, *53*, 1693–1698.
- (2) Wise, M. D.; Holstein, J. J.; Pattison, P.; Besnard, C.; Solari, E.; Scopelliti, R.; Bricogne, G.; Severin, K. *Chem. Sci.* **2015**, *6*, 1004–1010.
- (3) Suzuki, K.; Tominaga, M.; Kawano, M.; Fujita, M. *Chem. Commun.* **2009**, 1638–1640.
- (4) Tateishi, T.; Zhu, W.; Foianesi-Takeshige, L. H.; Kojima, T.; Ogata, K.; Hiraoka, S. *Eur. J. Inorg. Chem.* **2018**, 1192–1197.
